1 14 April 2017

2

3 **Preexisting antibodies can protect against congenital cytomegalovirus infection in**  
4 **monkeys**

5

6 Cody S. Nelson,<sup>1</sup> Diana Vera Cruz,<sup>2</sup> Dollnovan Tran,<sup>3</sup> Kristy M. Bialas,<sup>1</sup> Lisa Stamper,<sup>1</sup> Huali  
7 Wu,<sup>4</sup> Margaret Gilbert,<sup>3</sup> Robert Blair,<sup>3</sup> Xavier Alvarez,<sup>3</sup> Hannah Itell,<sup>1</sup> Meng Chen,<sup>1</sup> Ashlesha  
8 Deshpande,<sup>5</sup> Flavia Chiuppesi,<sup>6</sup> Felix Wussow,<sup>6</sup> Don J. Diamond,<sup>6</sup> Nathan Vandergrift,<sup>1</sup> Mark R.  
9 Walter,<sup>5</sup> Peter A. Barry,<sup>7</sup> Michael Cohen-Wolkowicz,<sup>4</sup> Katia Koelle,<sup>2</sup> Amitinder Kaur,<sup>3\*</sup> Sallie R.  
10 Permar<sup>1\*</sup>

11

12 <sup>1</sup>Human Vaccine Institute, Duke University School of Medicine, Durham, NC, USA.

13 <sup>2</sup>Department of Biology, Duke University, Durham, NC, USA.

14 <sup>3</sup>Tulane National Primate Research Center, Tulane University, Covington, LA, USA.

15 <sup>4</sup>Duke Clinical Research Unit, Duke University School of Medicine, Durham, NC, USA.

16 <sup>5</sup>Department of Microbiology, University of Alabama, Birmingham, AL, USA.

17 <sup>6</sup>Department of Experimental Therapeutics, Beckman Research Institute of the City of Hope,  
18 Duarte, CA, USA.

19 <sup>7</sup>Center for Comparative Medicine, Department of Pathology and Laboratory Medicine,  
20 University of California, Davis, CA, USA.

21 \*Please address correspondence to Sallie R. Permar ([sallie.permar@dm.duke.edu](mailto:sallie.permar@dm.duke.edu)) and  
22 Amitinder Kaur ([akaur@tulane.edu](mailto:akaur@tulane.edu))

23

24 **Abstract WC:** 149

25 **Main Text WC:** 3,627

26 **Methods WC:** 3,165

27 **Conflict of Interest:**

28 S.R.P provides consulting services to Pfizer Inc. for their preclinical human cytomegalovirus  
29 (HCMV) vaccine program and associated animal models. The other authors have no conflicts of  
30 interest to declare.

31

32 **Abstract:**

33 Human cytomegalovirus (HCMV) is the most common congenital infection and a known cause  
34 of microcephaly, sensorineural hearing loss, and cognitive impairment among newborns  
35 worldwide. Natural maternal HCMV immunity reduces the incidence of congenital infection, but  
36 does not prevent the disease altogether. We employed a nonhuman primate model of  
37 congenital CMV infection to investigate the ability of preexisting antibodies to protect against  
38 placental CMV transmission. Pregnant, CD4+ T cell-depleted, rhesus CMV (RhCMV)-  
39 seronegative rhesus monkeys were treated with either standardly-produced hyperimmune  
40 globulin (HIG) from RhCMV-seropositive macaques or dose-optimized, potently RhCMV-  
41 neutralizing HIG prior to intravenous challenge with an RhCMV swarm. HIG passive infusion  
42 provided complete protection against fetal loss in both groups, and the potently-neutralizing HIG  
43 additionally inhibited placental transmission of RhCMV. Our findings suggest that antibody alone  
44 at the time of primary infection can prevent congenital CMV and therefore could be a primary  
45 target of vaccines to eliminate this neonatal infection.

46

47 **Introduction:**

48           The current epidemic of Zika virus in the Americas has raised significant awareness of  
49 the societal and pediatric health impact of a congenitally-transmitted neuropathogen.<sup>1</sup> Yet nearly  
50 1 million infants worldwide (1 out of every 150 live births) are born each year with congenital  
51 human cytomegalovirus (HCMV) infection.<sup>2,3</sup> Congenital HCMV, like congenital Zika virus, can  
52 cause microcephaly, hearing/vision loss, and abnormalities in nervous system development.<sup>2,4</sup>  
53 And though HCMV accounts for more congenital disease than all 29 newborn conditions  
54 currently screened for in the United States combined,<sup>5</sup> public knowledge and effective  
55 interventions are severely lacking.<sup>6,7</sup> In recognition of this burden of disease, a congenital  
56 HCMV vaccine has remained a “Tier 1 priority” of the National Academy of Medicine for the past  
57 15 years.<sup>8</sup>

58           Drawing upon standard vaccine strategies, the HCMV field has previously attempted to  
59 induce potent antiviral immunity by varying approaches including attenuation of live viruses,<sup>9-11</sup>  
60 formulation of HCMV glycoprotein subunit vaccines,<sup>12-14</sup> use of viral vectors for epitope  
61 expression,<sup>15-17</sup> and delivery of single and bivalent DNA plasmid vaccines.<sup>18,19</sup> While all vaccine  
62 platforms tested thus far ultimately failed to reach target endpoints in human clinical trials, the  
63 HCMV gB subunit vaccine demonstrated moderate (~50%) efficacy at preventing primary  
64 HCMV infection, which is promising for future vaccine-development efforts.<sup>13,14</sup> Additional  
65 retrospective human studies have reported that neutralizing antibodies targeting HCMV surface  
66 glycoproteins are correlated with reduced incidence of congenital virus transmission after  
67 primary maternal HCMV infection.<sup>20-22</sup> Yet, a recent clinical trial failed to demonstrate a  
68 significant reduction in rates of congenital HCMV infection following passive infusion of  
69 hyperimmune globulin (HIG) to pregnant women with primary HCMV infection. Results from  
70 these past studies emphasize possible challenges for the development of an efficacious  
71 antibody-based vaccine.<sup>23</sup>

72           One major barrier the HCMV vaccine field has faced is the lack of a highly-translatable  
73 animal model of congenital virus transmission. For the past 50 years, vaccine efficacy studies  
74 that evaluate protection against congenital HCMV transmission have been reliant upon either  
75 (1) small-animal models using species-specific viruses with limited HCMV sequence homology  
76 or (2) costly and arduous human clinical trials. We recently reported on the first nonhuman  
77 primate (NHP) model of congenital CMV transmission following primary infection of rhesus  
78 monkey dams with rhesus CMV (RhCMV),<sup>24</sup> which is genetically more similar to HCMV than  
79 guinea pig or murine CMV.<sup>24-26</sup> Our study established that RhCMV could cross the placenta and  
80 cause congenital infection following intravenous (IV) inoculation of either immune competent or  
81 CD4+ T cell-depleted seronegative dams during the second trimester of pregnancy. The IV  
82 route of RhCMV inoculation was selected for this experimental congenital infection model over  
83 mucosal routes of exposure as it induced reproducible high levels of viremia and virus shedding  
84 in the urine and saliva of infected macaques, and hence best mirrored the prerequisite for  
85 systemic CMV replication prior to placental virus transmission in congenital CMV infection. In  
86 this study, we observed that CD4+ T cell-depleted dams frequently aborted their fetus following  
87 virus inoculation, exhibited higher plasma and amniotic fluid viral loads, and had delayed  
88 production of autologous neutralizing antibodies.

89           These results suggested that maternal humoral immunity may impact systemic and  
90 intrauterine RhCMV replication, thereby influencing the severity of congenital infection. As such,  
91 we sought to use this NHP model to investigate whether preexisting antibody alone, in the  
92 absence of virus-specific T cell responses, could protect against placental RhCMV transmission  
93 or reduce congenital RhCMV infection severity. The passive infusion of antibodies in this study  
94 was not intended to model a treatment strategy for the prevention of either maternal CMV  
95 acquisition or fetal virus transmission, but rather as means to understand the protection  
96 conferred by preexisting maternal antibody. These insights will inform rational development of a

97 vaccine to elicit the most critical immune responses required to eliminate congenital HCMV  
98 disease.

99 **Results:**

100 *Hyperimmune globulin (HIG) production and study design.* Two separate preparations of HIG  
101 were purified from plasma of RhCMV-seropositive rhesus monkey donors. The first “standard”  
102 preparation was obtained from donors with high levels of total RhCMV-specific IgG, while the  
103 second “high-potency” preparation was purified from plasma of donors exhibiting robust  
104 epithelial cell neutralizing IgG antibody titers ( $ID_{50} > 1:1000$ ). The high-potency preparation had  
105 approximately 4-fold greater epithelial cell neutralization potency and slightly increased overall  
106 glycoprotein binding (Fig. 1B,C) than the standard preparation. All RhCMV-seronegative dams  
107 in our current and previous study were infused with a CD4<sup>+</sup> T cell-depleting antibody at week 7  
108 of gestation, as described.<sup>24</sup> T cell phenotyping (Fig. S1, Table S1) revealed a decline in CD4<sup>+</sup>  
109 T cells with changes in the CD8<sup>+</sup> T cell population in response to primary RhCMV infection (Fig.  
110 S2). The dams were subsequently divided into 3 groups: control, standard, and high-potency.  
111 Each animal, including those in the control group (n=6, including 4 historical controls<sup>24</sup>) were IV  
112 inoculated with a swarm of fibroblast-tropic 180.92<sup>27</sup> and epithelial-tropic UCD52/UCD59<sup>28</sup>  
113 RhCMV viruses at week 8 of gestation (Fig. 1A). The standard group (n=3) was administered a  
114 single dose (100mg/kg) of the standard HIG preparation 1-hour prior to inoculation with the  
115 RhCMV variants (Fig. 1B), while the high-potency group (n=3) was given a dose-optimized  
116 regimen of the high-potency HIG preparation (Fig. S3) 1-hour prior to (150mg/kg) and 3 days  
117 following (100mg/kg) RhCMV inoculation (Fig. 1C, Fig. S4).

118  
119 *Glycoprotein targets of RhCMV-neutralizing antibodies.* To determine the RhCMV antibody  
120 specificity of the administered HIG, both standard (Fig. 2A) and high-potency HIG (Fig. 2B) were  
121 depleted for antibodies specific for RhCMV glycoprotein B (RhgB), RhCMV pentameric complex  
122 (RhPC), as well as RhgB/RhPC combined. Sufficient and selective depletion of glycoprotein-  
123 specific antibodies was confirmed by ELISA against the depleted epitope. We confirmed a  
124 >75% decrease in  $EC_{50}$  magnitude against depleted epitope and <20% change in  $EC_{50}$  against

125 non-depleted epitope (Fig. 2C). For the standard HIG preparation, absorption with RhgB  
126 resulted in a 2.2-fold reduction in the neutralization potency of plasma (mock depleted  $IC_{50}=32.3$   
127 vs. RhgB-depleted  $IC_{50}=71.8$ ), whereas absorption with RhPC resulted in a slightly higher 2.9-  
128 fold reduction in neutralization potency (RhPC-depleted  $IC_{50}=94.6$ ) (Fig. 2A,C). This same trend  
129 was observed for antigen depletion of the high-potency HIG, with a 2.9-fold reduction following  
130 RhgB depletion and a 3.3-fold reduction following RhPC depletion (Fig. 2B,C). Additionally,  
131 depletion of antibodies specific to *both* antigens reduced the neutralization potency of sera  
132 beyond that of depletion with either RhgB or RhPC alone (Fig. 2A-C). Altogether, these findings  
133 suggest that antibodies targeting both RhgB and RhPC contribute to overall RhCMV  
134 neutralization activity in roughly equivalent proportions. Furthermore, both RhgB and RhPC-  
135 specific antibodies were found to contribute to the RhCMV-neutralization titer in individual  
136 RhCMV-seropositive rhesus monkeys (Fig. S5).

137

138 *Antibody kinetics following HIG infusion.* Total RhCMV-binding IgM and IgG titers (Fig. 3A,B),  
139 RhgB and RhPC-specific IgG titers (Fig. 3C,D), and fibroblast/epithelial cell IgG neutralizing  
140 antibody titers (Fig. 3E,F), were measured following HIG infusion. Based on the known kinetics  
141 of antibody responses to primary viral infections, we attributed early detection of RhCMV-  
142 specific activity (within the first 10 days) to reflect passively-infused antibodies in the HIG  
143 preparations. Peak RhCMV-binding IgG as well as RhgB and RhPC-specific antibody titers in  
144 the high-potency HIG group surpassed those of the standard HIG group (Fig. 3B-D), while peak  
145 neutralization titers were similar between the two HIG groups (Fig. 3E-F). However, levels of  
146 IgG binding and antibody neutralization were sustained near peak levels for 10 days in the  
147 dose-optimized, high-potency HIG group compared to only 3 days in the standard HIG group  
148 (Fig. 3B-E). It is noteworthy that average binding IgG and epithelial cell neutralization titers in  
149 the high-potency HIG group surpassed those of chronically-infected rhesus monkeys (Fig. 3B,E,  
150 Fig. S5).<sup>24</sup> The standard HIG group had the most robust natural host immune response, with a

151 sustained elevation of RhCMV-specific IgM (Fig. 3A), as well as an exponential rise in binding  
152 IgG (Fig. 3B) and neutralization titers (Fig. 3D,E) that outpaced each of the other groups.

153

154 *RhCMV viral load, placental transmission, and shedding.* Following RhCMV inoculation, both  
155 control and standard HIG group animals showed a rapid onset of viremia that peaked at 2  
156 weeks post infection (Fig. 4A). In contrast, peak viremia in the high-potency HIG group was  
157 delayed until 4 weeks post infection (Fig. 4A), with a median value nearly two logs lower than  
158 the control group (Fig. 4E;  $p=0.047$ , corrected Wilcoxon exact test). RhCMV DNA copies in  
159 amniotic fluid were used as a marker for placental virus transmission because it is the gold-  
160 standard clinical test for congenital HCMV infection.<sup>29</sup> All 6 control animals had detectable  
161 RhCMV DNA in amniotic fluid between 1 and 3 weeks following infection (Fig. 4B), indicating  
162 100% placental transmission. Additionally, 2 of 3 animals in the standard HIG group had  
163 detectable congenital RhCMV infection (67% transmission) (Fig. 4B). However, none of the 3  
164 animals in the high-potency HIG group had detectable RhCMV DNA in the amniotic fluid,  
165 suggesting complete inhibition of congenital RhCMV transmission (Fig. 4B), and indicating a  
166 potential dose-effect of HIG-mediated protection. It is possible that systemic viral load  
167 influenced placental transmission, as animals that transmitted the virus had the highest peak  
168 plasma viral loads (Fig. 4E) and peak plasma viral load correlated with initial amniotic fluid viral  
169 load (Fig. 4F;  $r=0.812$ ,  $p=0.001$ , Spearman correlation). Finally, while there was no difference in  
170 the peak magnitude of viral shedding in maternal urine (Fig. 4C) or saliva (Fig. 4D) between  
171 treatment groups, there was delayed onset of shedding in both urine (Fig. 4G) and saliva (Fig.  
172 4H) following high-potency HIG infusion (both  $p=0.047$ , corrected Wilcoxon exact test).  
173 Altogether, these findings suggest that the presence of antibodies can reduce systemic  
174 replication and block dissemination of the virus to other anatomic compartments.

175



176 *Short NGS Amplicon Population Profiling (SNAPP) of plasma virus.* Using a novel, validated  
177 (Fig. S6) next generation sequencing technique, short 400bp regions within the RhCMV gB (Fig.  
178 5) and gL (Fig. S7) genetic loci were amplified and sequenced at great read depth. We found  
179 that, as previously reported,<sup>24</sup> the viral populations in plasma were composed primarily of strain  
180 UCD52 at each sampled time point and in all treatment groups. Additionally, viral diversity was  
181 measured by calculating mean nucleotide diversity ( $\pi$ ) across each sample's haplotype  
182 sequences (Table S2). Overall, the diversity of the dominant plasma UCD52 viral subpopulation  
183 was restricted in the high-potency HIG-treated animals compared to the control group at both  
184 the gB (Fig. 5C) and gL (Fig. S7) loci (both  $p=0.036$ , Wilcoxon exact test). Nucleotide diversity  
185 was not significantly different between the control and standard HIG groups.

186

187 *Fetal outcome and RhCMV congenital infection.* While 5 of 6 control dams aborted their fetus at  
188 3 weeks post RhCMV infection, administration of either HIG regimen was sufficient to protect  
189 fetuses from spontaneous abortion ( $p=0.015$ , exact log-rank test based on Heinze Macro; Fig.  
190 6A).<sup>30</sup> Furthermore, we observed a reduced rate of congenital RhCMV transmission among  
191 HIG-treated animals (2/6) compared to control animals (6/6) ( $p=0.049$ , exact log-rank test based  
192 on Heinze Macro; Fig. 6B).<sup>30</sup> Intriguingly, in the standard HIG group only 1 of 3 fetuses  
193 remained uninfected whereas all 3 fetuses in the high-potency HIG group were protected from  
194 infection (Fig. 6C), suggesting that preexisting, potentially CMV-neutralizing HIG can reduce the  
195 incidence of congenital infection. Of note, fetal growth curves (Fig. S8) and systemic cytokine  
196 profiles (Fig. S9) were similar between treatment groups, indicating no obvious off-target effects  
197 of the infused HIG. Reassuringly, all dams with detectable RhCMV DNA in amniotic fluid also  
198 had detectable virus in placenta, amniotic membrane, and umbilical cord (Fig. 6C). However,  
199 there was significant heterogeneity in viral burden and distribution among fetal tissue types:  
200 some fetuses had high copy number virus in nearly every tissue tested (174-97, IM67), while  
201 others only had virus detectable in the cochlea (GI73, HD79) (Fig. 6C). The persistence of virus

202 in the cochlea further validates this model as consistent with congenital HCMV infection in  
203 human fetuses. Congenital infection was additionally confirmed in placentas by  
204 immunohistochemical staining for the RhCMV IE-1 protein (Fig. 6D, Table S3).

205

206 *Placental transcriptome.* Congenital RhCMV infection appears to modify the placental  
207 transcriptome more radically than HIG infusion or fetal abortion, as more than 300 genes were  
208 differentially-expressed between RhCMV-transmitting and nontransmitting dams, but only 78  
209 when comparing HIG infusion/fetal outcome (Fig. 7A, Fig. S10). This finding suggests that HIG  
210 predominantly mediated protection through its impact on maternal systemic virus replication  
211 rather than through modification of the placental transcriptome. A large proportion of these  
212 differentially-expressed genes were immune-related. Additional cellular functions that appeared  
213 altered by RhCMV infection included metabolism, oxidoreductase activity, and cellular  
214 growth/proliferation (Table S4). Gene interaction analysis of differentially-expressed genes  
215 between RhCMV-transmitting and nontransmitting dams (Fig. 7B) revealed that the placental  
216 transcriptome was heavily biased towards up-regulation of genes in transmission. Furthermore,  
217 certain gene nodes had numerous connections to other differentially regulated genes (e.g.  
218 VCAM1, EGFR, GZMB, LYN, FYN, GAPDH), suggesting that these “keystone” genes are  
219 central to the cellular pathways induced by RhCMV infection. Focusing on a subset of genes  
220 involved in innate vs. adaptive immunity (Fig. 7C), we note that there is a potential bias for  
221 activation of innate immune pathways by placental RhCMV infection. Finally, cell type  
222 enrichment analysis based upon previously-described genes involved in cellular  
223 activation/processes<sup>31</sup> demonstrated no preference at the transcriptome level for myeloid vs.  
224 lymphoid lineages (Fig. 7D). However, Natural Killer (NK) cell-specific genes had the most  
225 robust differential expression (Fig. 7D), and we identified 21 unique genes known to be  
226 associated with NK cell function and/or chemotaxis (Fig. 7E, Table S5) including killer  
227 immunoglobulin-like receptors (KIR2DL4) and killer lectin-like receptors (KLRD1, KLRC1,

228 KLRC3, KLRB1). Furthermore, non-classical MHC molecules HLA-E and HLA-G (rhesus analog  
229 inferred by IPA database) were up-regulated.

230 **Discussion:**

231           The role of preexisting antibodies in prevention of congenital HCMV infection remains  
232 controversial within the HCMV vaccine field, yet our findings indicate that a dose-optimized  
233 preinfusion with potently-neutralizing HIG can block placental RhCMV transmission in a rhesus  
234 monkey model of congenital CMV. Our study illustrates that factors such as maternal antibody  
235 titer and neutralization potency at the time of peak CMV viremia may be important  
236 considerations for antibody-mediated protection against congenital CMV infection. In this study,  
237 given the experimental setup, we have not definitively proven that it is neutralization titer (and  
238 not other factors such as total amount of binding antibody, antibody-dependent cellular  
239 cytotoxicity, or reduction in maternal viral load) that is protective against congenital RhCMV  
240 transmission. Nevertheless, these data substantiate observational human cohort studies  
241 suggesting that maternal HCMV-specific antibodies decrease risk of placental virus  
242 transmission.<sup>20-22,32</sup> Furthermore, these data affirm findings from the guinea pig model of  
243 congenital infection that demonstrate that preexisting antibodies (from either glycoprotein  
244 immunization or passive HIG/monoclonal antibody infusion) can reduce the incidence and/or  
245 severity of congenital gpCMV infection.<sup>33-36</sup>

246           The therapeutic efficacy of HIG in preventing placental transmission in mothers with  
247 primary HCMV infection is a topic of ongoing investigation. Several non-randomized small-scale  
248 clinical trials<sup>37,38</sup> and a case-control study<sup>39</sup> concluded that post-infection HIG infusion  
249 significantly reduced rates of placental HCMV transmission and improved infant outcomes.  
250 Animal studies in the guinea pig model of congenital infection further corroborated these  
251 findings.<sup>35,40</sup> However, it was perhaps unsurprising when a large-scale, randomized, placebo-  
252 controlled trial did not find significant reduction in rates of congenital infection in mothers with  
253 primary HCMV infection that were subsequently treated with HIG, and revealed no difference in  
254 virus-specific antibody titers, effector T cell count, or the level of plasma viremia between the  
255 HIG-treated and placebo groups.<sup>23</sup> Several confounding factors may explain the lack of efficacy

256 of HIG treatment in this large-scale clinical trial. First, it was unknown in this study whether  
257 congenital transmission had already occurred prior to initiating therapeutic HIG treatment.  
258 Second, there is no concrete evidence for the therapeutic efficacy of the clinically-utilized  
259 product (Cytotect<sup>®</sup>), and therefore it is unknown whether HIG infusion achieved a titer that was  
260 both sustained and/or sufficient for effective anti-HCMV immunity.

261 This study was not intended to model a therapeutic treatment regimen but rather to  
262 directly address the clinical question: can preexisting antibodies alone prevent congenital CMV  
263 infection? The advantages of our NHP model are that the timing of infection is predefined and  
264 serum antibody titer can be titrated. By utilizing passive infusion experiments with different  
265 dosing regimens and potency of RhCMV-specific antibodies prior to RhCMV inoculation, we  
266 were able to model the requirements for preexisting antibodies to confer protection against  
267 congenital RhCMV infection. Moreover, conducting the experiments in a CD4+ T cell-depletion  
268 model also allowed us to address the protective role of antibodies to the exclusion of RhCMV-  
269 specific cellular immune responses. Our results suggest that a single 100mg/kg dose of  
270 standard neutralizing potency HIG (donor plasma screened by elevated ELISA OD, as is done  
271 for the clinical product Cytotect<sup>® 41</sup>) delivered immediately prior to RhCMV infection can reduce  
272 the severity of congenital infection (0 of 3 monkeys aborted) but is insufficient to prevent  
273 congenital CMV transmission (2 of 3 monkeys transmitted). However, a dose-optimized  
274 preinfusion of a higher neutralizing potency HIG product may be more effective in preventing  
275 and/or decreasing the severity of congenital infection.

276 To our knowledge, the epitope specificity of RhCMV-neutralizing antibodies has not  
277 been previously reported. It has been well established for HCMV that, while gB is an important  
278 target of neutralizing antibodies, the majority of neutralization activity in seropositive individuals  
279 is directed against the gH/gL/UL128-131A pentameric complex.<sup>42,43</sup> Furthermore, the  
280 pentameric complex has also been shown to be a target of neutralizing antibodies for guinea pig  
281 CMV.<sup>44</sup> In this study, we identified that antibodies targeting both RhgB and RhPC contribute to

282 the total neutralization activity of RhCMV-seropositive monkey sera in approximately equivalent  
283 proportions (Fig. 2). It is certainly reassuring for the translational applicability of this animal  
284 model system that RhPC-directed antibodies are neutralizing; however, it is unclear why the  
285 relative proportions of PC-directed neutralization activity would differ between HCMV (~85%)<sup>42</sup>  
286 and RhCMV (~50%). We hypothesize that this could explain why the magnitude of RhCMV  
287 neutralizing antibody titers are roughly equivalent magnitude when measured in both fibroblasts  
288 and epithelial cells (Fig. 3), whereas HCMV neutralizing antibody titers are nearly an order of  
289 magnitude lower in fibroblasts than epithelial cells.<sup>45</sup> Subsequent studies are needed to improve  
290 our understanding of this potential difference in viral biology and/or antiviral humoral immune  
291 factors between RhCMV and HCMV.

292 It has been theorized that passively-infused antibodies can reduce systemic maternal  
293 viral load and thereby reduce the likelihood of placental transmission,<sup>20,37</sup> though this correlation  
294 has not been observed in some human primary infection cohorts.<sup>46</sup> In this study, dams with  
295 reduced peak plasma viral load in the presence of antibodies did not transmit the infection to  
296 their fetus *in utero* (Fig. 4E). This trend was accompanied by a significant reduction in  
297 nucleotide diversity of the plasma virus population in the high-potency HIG group, assessed at  
298 both the gB and gL loci (Fig. 5, Fig. S7). Thus, we hypothesize that in the setting of antibody-  
299 mediated immune pressure, the number of unique viral variants is restricted following primary  
300 infection and systemic replication is inhibited, resulting in decreased viral transmission to the  
301 fetus.

302 The placental transcriptome was examined to investigate whether HIG-mediated  
303 protection against congenital infection occurs via gene regulation at the level of the  
304 placenta/decidua. Intriguingly, RhCMV infection impacted the transcription profile of  
305 placental/decidual cells to a much greater degree than HIG-treatment or fetal abortion,  
306 suggesting that HIG predominantly mediated protection through its impact on maternal systemic  
307 virus replication. The preferential activation of innate over adaptive immune processes in

308 RhCMV-infected placenta (Fig. 7D) is perhaps due to the tolerogenic environment at the  
309 maternofetal interface.<sup>47,48</sup> Furthermore, the apparent upregulation of NK cell-specific genes in  
310 RhCMV-infected placenta (Fig. 7D,E) may be attributable to either NK cells being the major  
311 leukocyte in the decidua during the early stages of pregnancy<sup>49</sup> or by the propensity for NK cells  
312 to control CMV infection *in vivo*.<sup>50,51</sup>

313 Our findings are based on a relatively small cohort of animals (n=12) due to the severely  
314 limited availability of breeding, seronegative female monkeys. One consequence of our limited  
315 animal population is the need to amplify the biologic effects of placental RhCMV infection  
316 through both CD4+ T cell depletion and IV viral inoculation. Though both these artificial methods  
317 distort the reality of natural CMV infection and bias our results in favor of placental transmission,  
318 we propose that these interventions strengthen the major finding in this study that preexisting  
319 antibody alone (in the absence of cell-mediated immunity) can prevent placental transmission in  
320 the setting of acute maternal viremia. One additional limitation to our study design is that,  
321 though HIG is known to non-specifically modulate immune responses to prevent inflammatory  
322 disease,<sup>52-54</sup> we had to limit the number of individual control groups in this study and did not  
323 have a cohort of animals infused with non RhCMV-reactive HIG. Because of this deficiency, we  
324 cannot definitively rule out non-specific immunomodulatory effects of the infused HIG, though all  
325 infusion groups had similar cytokine expression profiles following infection (Fig. S9).  
326 Furthermore, since protection against congenital transmission may have been achieved as a  
327 result of a “dose-effect” in the high-potency HIG group vs. the standard group, antibody-  
328 mediated protection is likely due to anti-viral function rather than immunomodulatory properties  
329 of the infused HIG.

330 Despite these limitations, this is the first primate study to demonstrate that preexisting  
331 maternal antibody alone has the potential to block and ameliorate placental CMV transmission.  
332 Thus, a maternal vaccine that elicits durable, potently-neutralizing humoral immunity could be  
333 an ideal intervention to eliminate pediatric disabilities associated with congenital HCMV

334 infection. Based on our findings we hypothesize that the prevention of maternal HCMV  
335 acquisition (i.e. sterilizing immunity), which has been the target of several phase II vaccine  
336 trials,<sup>13,14</sup> may not be the most appropriate measurable outcome for a congenital HCMV vaccine  
337 that ultimately seeks a reduction in the frequency of congenital HCMV transmission. Since we  
338 observed that antibody-mediated protection against congenital HCMV was associated with a  
339 decrease in maternal systemic viral load and constrained viral diversity, these surrogate  
340 markers could potentially serve as clinical study endpoints. Subsequent studies should  
341 investigate the epitope specificity and properties of protective immunoglobulins for future  
342 rational design of a maternal congenital HCMV vaccine.



343 **Methods:**

344 *Animals.* Indian-origin rhesus macaques were housed at the Tulane Primate National Research  
345 Center and maintained in accordance with institutional and federal guidelines for the care and  
346 use of laboratory animals.<sup>55</sup> All females were from the expanded specific pathogen-free (eSPF)  
347 colony and confirmed to be RhCMV seronegative by whole-virion ELISA screening for RhCMV-  
348 specific IgM and IgG plasma antibodies. RhCMV-seronegative males and females were then  
349 co-housed and females were screened every 3 weeks for pregnancy via abdominal ultrasound.  
350 All animals in this study were between 4 and 9 years of age at the time of pregnancy/enrollment  
351 (JC65=4.7y, GI73=8.8y, IM67=5.7, JM52=4.6, HR73=7.6, HD82=8.7, HD79=8.7, GM04=8.8,  
352 HD79=8.7). Gestational dating was performed by sonography, and was based on gestational  
353 sac size (average of three dimensions) and crown rump length of the fetus. At week 7 of  
354 gestation, 12 RhCMV-seronegative dams were administered an IV 50mg/kg dose of  
355 recombinant rhesus CD4+ T cell-depleting antibody (CD4R1 clone; Nonhuman Primate  
356 Reagent Resource).

357 One week following CD4+ T cell depletion, 3 seronegative dams were administered a  
358 single dose (100mg/kg) of hyperimmune globulin (HIG) produced from the plasma of RhCMV  
359 seropositive monkeys screened by RhCMV whole virion IgG binding ELISA (50% Inhibitory  
360 Concentration-IC<sub>50</sub>=22.64µg/mL) 1hr prior to intravenous (IV) challenge with a mixture of  
361 RhCMV strains (2×10<sup>6</sup> TCID<sub>50</sub> RhCMV 180.92<sup>27</sup> in one arm and 1×10<sup>6</sup> TCID<sub>50</sub> each of RhCMV  
362 UCD52 and UCD59<sup>28</sup> in the other arm, diluted in serum-free RPMI). The remaining 3 dams  
363 received a dose-optimized (2 dose) regimen of a potentially-neutralizing HIG product purified from  
364 RhCMV seropositive monkeys with a plasma epithelial cell neutralization titer >1000  
365 (IC<sub>50</sub>=5.88µg/mL) at 1hr prior to IV RhCMV inoculation (150mg/kg) and 3 days post infection  
366 (100mg/kg), respectively. This dose-optimized regimen was based on pharmacokinetic  
367 modeling of the neutralization activity from the standard group (Fig. S4). 6 dams were non-  
368 infused control animals (including 4 historical controls)<sup>24</sup>.

369 Blood draws were performed on the standard potency infused animals on the following  
370 days after infection/infusion: 0, 2, 4, 7, 10, 14, 21, 28, 35, 42. The high-potency infused animals  
371 were sampled at days: 0, 1, 2, 3, 4, 7, 10, 14, 21, 28, 35, 42, 49, 56, 63, 70, 77, 84. Amniotic  
372 fluid (by amniocentesis), urine (by clean pan collection), and saliva (by oral saline wash), were  
373 also collected on all animals on a weekly to biweekly intervals until fetal harvest. In the case of  
374 fetal abortion, placental and fetal products were obtained from the cage and fixed in formalin for  
375 hematoxylin–eosin staining and immunohistochemistry or frozen. Fetal growth was monitored  
376 by measuring biparietal diameter and femur length during weekly to biweekly fetal sonography  
377 over the course of gestation. Sonography was also used to screen for signs of congenital  
378 RhCMV-associated sequelae. The fetuses of dams in the standard HIG group were harvested  
379 at 6 weeks following infection, and those of the high-potency HIG group at 12 weeks following  
380 infection.

381  
382 *IgG purification for HIG preparations.* Seropositive rhesus monkeys plasma donors were  
383 screened by either high OD binding against UCD52 virions (top 50% seropositive OD; standard  
384 HIG) or by epithelial cell neutralization titer ( $ID_{50}>1000$ ; high-potency HIG). Donor plasma was  
385 mixed with equal volume of Protein G IgG Binding Buffer (Pierce) and spun at 4700 RPM for 25  
386 minute at RT. Pellet was discarded and supernatant was filter sterilized through a 0.22 $\mu$ m filter  
387 and used for purification. Sera mixture was passed through gravity column packed with Protein  
388 G Plus Agarose beads (Pierce). Beads were washed with 5 column volume (CV) of IgG Binding  
389 buffer and eluted with 2 CV of IgG Elution Buffer (Pierce). Eluted IgG was immediately  
390 neutralized with 1M Tris buffer, pH=8. Beads were washed with 5 CV of IgG binding buffer.  
391 Serum was passed through Protein G Plus Agarose beads 10 times and IgG was eluted each  
392 time. All IgG elutions were concentrated and buffer exchanged into 1x PBS using Millipore  
393 Amicon 30K filters (Fisher Scientific). Final preparations were tested by ELISA for the presence  
394 of bacterial endotoxin. See quality control sheet for high-potency HIG preparation in Fig. S3.

395  
396 *Pharmacokinetic modeling for dose-optimized HIG infusion.* Plasma concentration-time data of  
397 IgG in rhesus monkeys were adjusted using baseline value of IgG for each individual animal  
398 and analyzed using WinNonlin (version 6.3.0; Certara). One- and two-compartment PK models  
399 with first-order elimination were evaluated to characterize the observed data. PK parameters  
400 including clearance (CL), volume of distribution (V), and half-life associated with the elimination  
401 phase ( $T_{1/2,\beta}$ ) were estimated for each animal. Simulations for optimizing dosing regimen in the  
402 second PK study were performed to ensure IgG concentrations above 1-1.2 mg/ml ( $\sim ID_{50} > 1000$ )  
403 for 2 weeks after initiating treatment.

404  
405 *Cell culture and virus growth.* Telomerized rhesus fibroblasts (TeloRF) cells were maintained in  
406 Dulbecco's modified Eagle medium (DMEM) containing 10% FCS, 2mM L-glutamine, 50U/mL  
407 penicillin, 50 $\mu$ g/mL each streptomycin and gentamicin, and 100 $\mu$ g/mL geneticin G418  
408 (Invitrogen). Monkey kidney epithelial (MKE) cells were cultured in DMEM-F12 supplemented  
409 with 10% FCS, 2mM L-glutamine, 1mM sodium pyruvate, 50U/mL penicillin, 50 $\mu$ g/mL each  
410 streptomycin and gentamicin, and 5mL of epithelial growth cell supplement (ScienCell). Cell  
411 lines were tested for mycoplasma contamination every 6 months.

412 Epithelial-tropic UCD52 and UCD59 were propagated on MKE cells for 3-4 passages,  
413 then passaged once on TeloRF cells in order to increase viral titer. This single round of  
414 fibroblast amplification was intended to minimize any alteration of viral tropism or glycoprotein  
415 surface expression. Virus infections were performed with similar media but with 5% FCS for 4h  
416 at 37°C and 5% CO<sub>2</sub>. Virus was harvested when cells showed 90% cytopathic effects (CPE) by  
417 cell scraping. For harvest, infected cells were pelleted by low-speed centrifugation, and the  
418 supernatant was placed on ice. Cell pellets were then resuspended in infection media and  
419 subjected to three rounds of freeze/thaw cycles. Following centrifugation, supernatants were  
420 combined, passed through a 0.45 $\mu$ m filter, overlaid onto a 20% sucrose cushion, and

421 ultracentrifuged at 70,000×g for 2h at 4 °C using an SW28 Beckman Coulter rotor. Virus pellets  
422 were resuspended in DMEM containing 10% FCS and titered in TeloRFs using the  
423 TCID<sub>50</sub> method of Reed and Muench.

424

425 *Characterization of T cells by flow cytometry.* Maternal peripheral CD4<sup>+</sup> and CD8<sup>+</sup> T cells were  
426 phenotyped by mixing 100µL of EDTA-anticoagulated blood with a pool of fluorescently labeled  
427 monoclonal antibodies including CCR7, CD95, CD28, CD4, CD20, CD3, CD8, and CD45 (Table  
428 S1). After a 30 min incubation at 4°C, cells were washed with PBS supplemented with 2% FCS  
429 and pelleted at 100×g for 5 min. Red blood cells were then lysed by adding 1×BD lysis buffer for  
430 40min at room temperature. Intact cells were centrifuged at 150×g for 5 min, washed once with  
431 PBS containing 2% FCS, and resuspended in 100µL of PBS with 2% FCS. Cells were fixed by  
432 adding 15µL of 2% formaldehyde and processed by flow cytometry. Gating of CD4<sup>+</sup> and CD8<sup>+</sup>  
433 populations/subpopulations was completed in FlowJo as is outlined in Fig. S1.

434

435 *Antibody kinetics and glycoprotein binding specificity.* Virus-specific IgM and IgG antibody  
436 kinetics were measured in maternal plasma by whole-virion ELISAs, and glycoprotein specificity  
437 of HIG and maternal plasma samples was measured by ELISA against soluble RhCMV gB  
438 protein and RhCMV pentameric complex. Plates were coated with antigen diluted in PBS with  
439 Mg<sup>2+</sup> and Ca<sup>2+</sup> (PBS+) overnight at 4°C – either 5,120 PFU/mL of filtered RhCMV UCD52 virus  
440 for whole virion ELISA or 0.13µg/mL soluble glycoprotein. Following incubation, plates were  
441 blocked for 2h with blocking solution (PBS+, 4% whey protein, 15% goat serum, 0.5% Tween-  
442 20), then threefold serial dilutions of plasma (1:30 to 1:5,314,410) were added to the wells in  
443 duplicate for 1.5h. Plates were then washed twice and incubated for 1hr with anti-monkey IgM  
444 or anti-monkey IgG HRP-conjugated antibodies (Rockland) at a 1:10,000 dilution. After four  
445 washes, SureBlue Reserve TMB Microwell Peroxidase Substrate (KPL) was added to the wells  
446 for 10min, and the reaction was stopped by addition of 1% HCl solution. Plates were read at

447 450nm. The lower threshold for antibody reactivity was considered to be 3 SDs above the  
448 average optical density measured for the preinfection, RhCMV seronegative samples at the  
449 starting plasma dilution (1:30).

450

451 *Neutralization assays.* TeloRF and MKE cells were seeded into 96-well plates and incubated for  
452 2 days at 37°C and 5% CO<sub>2</sub> to achieve 100% confluency. After 2 days, serial dilutions (1:10 to  
453 1:30,000) of heat-inactivated rhesus plasma were incubated with RhCMV 180.92 or RhCMV  
454 UCD52 (MOI=1) in a 50µl volume for 45min at 37°C. The virus/plasma dilutions were then  
455 added in duplicate to wells containing TeloRF or MKE cells, respectively, and incubated at 37°C  
456 for 2h. After washing, cells were incubated at 37°C for an additional 16h. Infected cells were  
457 then fixed for 20min at -20°C with 1:1 methanol/acetone, rehydrated in PBS with Mg<sup>2+</sup> and Ca<sup>2+</sup>  
458 (PBS+) 3x5min, and processed for immunofluorescence with 1µg/mL mouse anti-RhCMV IE-1  
459 monoclonal antibody (provided by Dr. Daniel Cawley, Oregon Health and Science University)  
460 followed by a 1:500 dilution of goat anti-mouse IgG-Alexa Fluor 488 antibody (Millipore). Nuclei  
461 were stained with DAPI for 5min (Pierce). Infection was quantified in each well by automated  
462 cell counting software using either: (1) a Nikon Eclipse TE2000-E fluorescent microscope  
463 equipped with a CoolSNAP HQ-2 camera at 10× magnification OR (2) a Cellomics Arrayscan  
464 VTI HCS instrument at 10x magnification. Subsequently, the 50% inhibitory dose was calculated  
465 as the sample dilution that caused a 50% reduction in the number of infected cells compared  
466 with wells treated with virus only using the method of Reed and Muench.

467

468 *Soluble protein bead coupling and antibody depletion.* Cyanogen bromide (CNBr) activated  
469 Sepharose beads (GE Healthcare) were re-hydrated in 1mM HCl, then suspended in coupling  
470 buffer (0.1M NaHCO<sub>3</sub> + 0.5M NaCl, pH 8.3) at room temperature (RT). Every 100µL of bead  
471 slurry was combined with 150µg soluble RhgB or RhPC ligands. Coupling was allowed to

472 proceed for 1h at RT on an inversion rotator. Excess soluble protein was washed off with 5  
473 column volumes coupling buffer. CNBr unbound active groups were blocked by incubation in  
474 0.1M Tris HCl, pH 8.0 for 2h at RT on inversion rotator. Protein-bound beads were washed with  
475 3 cycles of alternating pH: first 0.1M acetic acid, pH 4.0, then second 0.1M Tris-HCl, pH 8.0.  
476 Beads were suspended in PBS and stored at 4°C. For depletion of antibodies for a given  
477 specificity, 100 $\mu$ L of protein-coupled bead slurry were loaded into a spin microelution column  
478 (Pierce, TFS). 50 $\mu$ L of plasma was filtered (0.22 $\mu$ M), then loaded into the column. Plasma was  
479 centrifuged through the column x5 without elution between steps. Bound IgG was eluted using a  
480 0.2M glycine elution buffer, pH 2.5. Column was recalibrated by washing with 3 cycles of  
481 solutions of alternating pH (as described above). Adequate and specific depletion of plasma  
482 was confirmed by ELISA against the depleted protein (>75% change in EC<sub>50</sub> against depleted  
483 epitope; <20% change in EC<sub>50</sub> against non-depleted epitope).

484  
485 *Tissue processing and staining.* Standard immunoperoxidase staining for RhCMV was  
486 performed on formalin-fixed, paraffin-embedded sections of multiple tissues. Tissue sections  
487 were deparaffinized in xylene, rehydrated in graded alcohol, and subsequently blocked with  
488 0.3% hydrogen peroxide in PBS for 30min. Pretreatment involved microwaving for 20min in  
489 0.01% citrate buffer (Vector laboratories), followed by 45min of cooling at room temperature.  
490 Following pretreatment, an avidin–biotin block (Invitrogen) and protein block with 10% normal  
491 goat serum (NGS) were conducted on all sections. A wash of Tris-buffered saline with 0.5%  
492 Tween-20 followed each step. Sections were incubated with anti–RhCMV IE1 polyclonal rabbit  
493 sera (kindly provided by P.A.B.) at a 1:1,600 dilution for 30 min at room temperature. Slides  
494 were then incubated with biotinylated goat anti-rabbit IgG (Invitrogen) at a 1:200 dilution in NGS  
495 for 30min at room temperature. This was followed by 30min incubation at room temperature with  
496 R.T.U. Vectastain ABC (Vector Laboratories). Immunolabeling was visualized using

497 diaminobenzidine and counterstained with Mayer's hematoxylin. Irrelevant, isotype-matched  
498 primary antibodies were used in place of the test antibody as negative controls in all  
499 immunohistochemical studies. Positive control tissues consisted of archived rhesus macaque  
500 lung and testis from an RhCMV-seropositive animal.

501

502 *Viral DNA isolation and assessment of viral load.* RhCMV viral load was measured in plasma,  
503 AF, saliva, urine, and tissues by quantitative RhCMV-specific PCR following DNA extraction.  
504 Urine and mouth washes were concentrated using Ultracel YM-100 filters (Amicon) and frozen  
505 for subsequent DNA extraction. DNA was extracted from urine using the QIAmp RNA minikit  
506 (Qiagen), from AF/saliva/plasma by using the QIAmp DNA minikit, and from snap-frozen tissue  
507 (10-25mg) after overnight Proteinase K digestion using the DNeasy Blood and Tissue kit  
508 (Qiagen). RhCMV DNA was quantitated by real-time PCR using the 5'-  
509 GTTTAGGGAACCGCCATTCTG-3' forward primer, 5'-GTATCCGCGTTCCAATGCA-3' reverse  
510 primer, and 5'-FAM-TCCAGCCTCCATAGCCGGGAAGG-TAMRA-3' probe, which amplify and  
511 detect a 108-bp region of the RhCMV IE1 gene.<sup>56</sup> Between 5-10ng of DNA was added as  
512 template to 50µL of 1×PCR mixture containing 300nM of each primer, 100nM probe, 2mM  
513 MgCl<sub>2</sub>, 200µM each of dATP, dCTP, and dGTP, 400µM dUTP, 0.01U/µL Amperase UNG,  
514 0.025U/µL Taq polymerase, and reaction buffer that includes passive reference dye ROX. PCR  
515 conditions consisted of an initial 2min cycle at 50°C followed by 10min at 95°C and 45 cycles of  
516 denaturation at 95°C for 15s and combined annealing/extension at 60°C for 1min. Data are  
517 expressed as copies per milliliter for plasma/AF and as copies per microgram input DNA for  
518 tissues/saliva/urine. RhCMV DNA was quantitated using a standard consisting of a plasmid  
519 containing the entire RhCMV IE1 gene. RhCMV DNA was detected with a linear dynamic range  
520 from 10<sup>0</sup> to 10<sup>6</sup> copies in the presence of genomic DNA.

521

522 *SNAPP (Short NGS Amplicon Population Profiling)*. Viral DNA was isolated from plasma using  
523 the High Pure Viral Nucleic Acid kit (Roche Life Science). Hypervariable regions 400bp in length  
524 within glycoprotein B and glycoprotein L were amplified in duplicate by a single round of PCR  
525 using 5'-AAGTGCTCGAAGGGCTTCTC-3' and 5'-TCTGGACATTGATCCGCTGG-3' for the gB  
526 region and 5'-GCGCGGCACACATTATCTAC-3' and 5'-GGTGAGTGCTGCTGTTTTGG-3' for  
527 the gL region. Overhang regions were conjugated to primer locus-specific sequences for  
528 subsequent Illumina index primer addition and sequencing: forward primer overhang=  
529 5'-TCGTCGGCAGCGTCAGATGTGTATAAGAGACAG-[locus]-3' and reverse primer overhang=  
530 5'-GTCTCGTGGGCTCGGAGATGTGTATAAGAGACAG-[locus]-3'. Approximately 10ng DNA  
531 was added as template to 50µL of 1×PCR mixture containing 100nM of each primer, 2mM  
532 MgCl<sub>2</sub>, 200µM each of dNTP mix (Qiagen), 0.025U/µL Phusion Taq polymerase. PCR  
533 conditions consisted of an initial 2min denaturation at 98°C, followed by the minimum number of  
534 PCR cycles to achieve adequate amplification (98°C for 10s, 65°C for 30s, and 72°C for 30s),  
535 and a final 72°C extension for 10min. Products were purified using Agencourt AMPure XP  
536 beads (Beckman Coulter), then Illumina Nextera XT index primers were added by 15 cycles of  
537 amplification. The resultant PCR product was gel purified using ZR-96 Zymoclean Gel DNA  
538 Recovery Kit (Zymogen). The molar amount of each sample was normalized by qPCR using the  
539 KAPA library amplification kit (KAPA Biosystems). The library of individual amplicons was  
540 pooled together, diluted to an end concentration of 10pm, combined with 20% V3 PhiX  
541 (Illumina), then sequenced on Illumina Miseq using a 600 cycle V3 cartridge (Illumina). For  
542 each primer set we confirmed that there was no significant primer bias through mixing viral DNA  
543 in known ratios and applying the SNAPP technique (Fig. S6).

544  
545 *SNAPP amplicon reconstruction and nucleotide diversity*. Sequences of the targeted regions on  
546 the genes gB and gL were reconstructed by merging the paired reads sets using the PEAR  
547 software under default parameters.<sup>57</sup>The fused reads were then filtered using the extractor tool



548 from the *SeekDeep* pipeline (<http://baileylab.umassmed.edu/seekdeep>), filtering sequences  
549 according to their length, overall quality scores and presence of the primer sequences. To  
550 homogenize the number of sequences per sample due to variable coverage, a random set of at  
551 most 10,000 sequences was retrieved from each sample to estimate strain frequency and  
552 nucleotide diversity. The number of sequences analyzed per sample varied from 2,000-10,000,  
553 depending on the sample coverage. Next, haplotype reconstruction was performed using the  
554 *qluster* tool from *SeekDeep*, which accounts for possible sequencing errors by collapsing  
555 fragments with mismatches at low quality positions. For each given sample, the haplotypes had  
556 to be present in two sample replicates to be taken into account. Each haplotype was assigned  
557 to 1 of the 3 inoculated viral strains by first calculating the nucleotide distance (nucleotide  
558 substitutions) between the haplotype and the reference viral strain, then assigning the haplotype  
559 to the strain with the shortest nucleotide distance. Nucleotide diversity was computed as the  
560 average distance between each possible pair of sequences belonging to the same reference  
561 strain.<sup>58</sup>

562  
563 *Placental RNA isolation and microarray.* Tissue sections weighing approximately 30mg were  
564 obtained from flash frozen, full-thickness rhesus placenta/decidua, lysed using a TissueLyser LT  
565 (Qiagen), then total RNA extracted using an RNeasy Mini Kit (Qiagen). RNA was assessed for  
566 quality with Agilent 2100 Bioanalyzer G2939A (Agilent Technologies) and Nanodrop 8000  
567 spectrophotometer (Thermo Scientific/Nanodrop) and confirmed to have:  $A_{260}/A_{280} > 1.8$ ,  
568  $A_{260}/A_{230} > 1.0$ , and  $RIN > 7.0$ . Hybridization targets were prepared with MessageAmp™ Premier  
569 RNA Amplification Kit (Applied Biosystems/Ambion) from total RNA, hybridized to Affymetrix  
570 GeneChip® Rhesus Macaque Genome arrays in Affymetrix GeneChip® hybridization oven 645,  
571 washed in Affymetrix GeneChip® Fluidics Station 450 and scanned with Affymetrix GeneChip®  
572 Scanner 7G according to standard Affymetrix GeneChip® Hybridization, Wash, and Stain  
573 protocols (Affymetrix). Affymetrix microarray data was initially processed, underwent QC, and

574 was normalized with the robust multi-array average method using the *affy*<sup>59</sup> Bioconductor<sup>60</sup>  
575 package from the R statistical programming environment (R studio version 0.99.902).  
576 Differential expression was carried out using a moderated t-statistic from the *limma*<sup>61</sup> package.  
577 The false discovery rate was used to control for multiple hypothesis testing. Gene set  
578 enrichment analysis<sup>62</sup> was performed to identify differentially regulated pathways and gene  
579 ontology terms for each of the comparisons performed. Gene sets specific for innate/adaptive  
580 immunity, myeloid/lymphoid lineages, and immune cell specific were obtained from previous  
581 reports<sup>31</sup> and supplemented from the literature such that each comparison group had >25  
582 characteristic genes (gene lists available upon request). Gene networks were constructed using  
583 NatureAnalyst<sup>63</sup>, with first order gene interactions inferred from the InnateDB interactome (Fig.  
584 7B)<sup>64</sup>. Genes related to NK cell function (Table S5) were determined using QIAGEN's Integrated  
585 Pathway Analysis (IPA) (NK cell activation and movement gene lists) and supplemented with  
586 those from the KEGG database (NK cell mediated cytotoxicity gene list).<sup>65</sup>

587

588 *Statistical analyses.* Nonparametric tests were utilized because of the small study size. For viral  
589 load/shedding statistical analyses (Fig. 4E-H), Wilcoxon exact tests were Bonferroni-type  
590 corrected using the method of Benjamini and Hochberg to account for multiple comparisons.<sup>66</sup>  
591 For sequence diversity analysis (Fig. 5, Fig. S7), UCD52 diversity was compared between  
592 treatment groups because it was the dominant strain replicating in plasma. First, median UCD52  
593 nucleotide diversity was calculated for each animal. Median values were compared first by  
594 Kruskal-Wallis test ( $p=0.036$ ), then by posthoc Mann-Whitney U test. Survival curve analyses  
595 were completed with an exact log-rank test based on Heinze macro.<sup>30</sup> All statistical tests were  
596 carried out using the R statistical interface (version 3.3.1, [www.r-project.org](http://www.r-project.org)) and were two-  
597 tailed.

598

599 *Study approval.* The animal protocol was approved by the Tulane University and the Duke  
600 University Medical Center Institutional Animal Care and Use Committees.

601

602 *Data and materials availability.* SNAPP sequence data used in this manuscript is being  
603 compiled and will be made available in the NCBI SRA database prior to publication. Placental  
604 transcriptome microarray data is currently available in the NCBI GEO repository (GSE87395;  
605 <http://www.ncbi.nlm.nih.gov/geo/query/acc.cgi?acc=GSE87395>).

606 **Author Contributions:**

607 A.K. and S.R.P. designed research; C.S.N., D.T., K.M.B., M.G., R.B., X.A., and L.S. performed  
608 research; C.S.N., D.V.C., R.B., X.A., H.I., H.W., and M.C. analyzed data; A.D., F.C., F.W.,  
609 D.J.D., N.V., M.W., P.A.B, M.C.W., K.K. contributed analytic tools/expertise/reagents; and  
610 C.S.N., A.K., and S.R.P. wrote the paper.

611 **Acknowledgements:**

612 The authors would like to recognize David Corcoran and the Duke Sequencing and Genomic  
613 Technologies Shared Resource for technical support, microarray data management, and  
614 feedback on the generation of the microarray data reported in this manuscript. Additionally, we  
615 would like to thank Dr. Xinzhen Yang and Pfizer Inc. for the generous gift of research materials.  
616 Finally, the excellent veterinary care and conduct of animal studies by the faculty and staff of the  
617 Departments of Veterinary Medicine and Collaborative Research at the Tulane National Primate  
618 Research Center (TNPRC) are gratefully acknowledged. The CD4+ T cell-depleting antibody  
619 used in these studies was provided by the NIH Nonhuman Primate Reagent Resource (R24  
620 OD010976, and NIAID contract HHSN 272201300031C). This work was supported by:  
621 NIH/NICHD Director's New Innovator grant to S.R.P (DP2HD075699), the TNPRC base grant  
622 NIH/NCRR (OD011104), NIH/NIAID grants to D.J.D. and P.A.B (R01AI103960, R01AI63356),  
623 and fellowship grant to C.S.N (F30HD089577). The funders had no role in study design, data  
624 collection and interpretation, decision to publish, or the preparation of this manuscript. The  
625 content is solely the responsibility of the authors and does not necessarily represent the official  
626 views of the National Institutes of Health.

627  
628  
629  
630  
631  
632  
633  
634  
635  
636  
637  
638  
639  
640  
641  
642  
643  
644  
645  
646  
647  
648  
649  
650  
651  
652

## BIBLIOGRAPHY

- 1 Zika cases and congenital syndrome associated with Zika virus reported by countries and territories in the Americas, 2015-2016. (World Health Organization).
- 2 Manicklal, S., Emery, V. C., Lazzarotto, T., Boppana, S. B. & Gupta, R. K. The "silent" global burden of congenital cytomegalovirus. *Clin Microbiol Rev* **26**, 86-102, doi:10.1128/CMR.00062-12 (2013).
- 3 (CDC), C. f. D. C. a. P. Knowledge and practices of obstetricians and gynecologists regarding cytomegalovirus infection during pregnancy--United States, 2007. *MMWR Morb Mortal Wkly Rep* **57**, 65-68 (2008).
- 4 Rasmussen, S. A., Jamieson, D. J., Honein, M. A. & Petersen, L. R. Zika Virus and Birth Defects--Reviewing the Evidence for Causality. *The New England journal of medicine* **374**, 1981-1987, doi:10.1056/NEJMs1604338 (2016).
- 5 Centers for Disease, C. & Prevention. Impact of expanded newborn screening--United States, 2006. *MMWR Morb Mortal Wkly Rep* **57**, 1012-1015 (2008).
- 6 Mussi-Pinhata, M. M. *et al.* Birth prevalence and natural history of congenital cytomegalovirus infection in a highly seroimmune population. *Clin Infect Dis* **49**, 522-528, doi:10.1086/600882 (2009).
- 7 Yamamoto, A. Y. *et al.* Congenital cytomegalovirus infection as a cause of sensorineural hearing loss in a highly immune population. *Pediatr Infect Dis J* **30**, 1043-1046, doi:10.1097/INF.0b013e31822d9640 (2011).
- 8 in *Vaccines for the 21st Century: A Tool for Decisionmaking The National Academies Collection: Reports funded by National Institutes of Health* (eds K. R. Stratton, J. S. Durch, & R. S. Lawrence) (2000).
- 9 Elek, S. D. & Stern, H. Development of a vaccine against mental retardation caused by cytomegalovirus infection in utero. *Lancet* **1**, 1-5 (1974).

- 653 10 Plotkin, S. A., Farquhar, J. & Horberger, E. Clinical trials of immunization with the Towne  
654 125 strain of human cytomegalovirus. *The Journal of infectious diseases* **134**, 470-475  
655 (1976).
- 656 11 Starr, S. E., Glazer, J. P., Friedman, H. M., Farquhar, J. D. & Plotkin, S. A. Specific  
657 cellular and humoral immunity after immunization with live Towne strain cytomegalovirus  
658 vaccine. *The Journal of infectious diseases* **143**, 585-589 (1981).
- 659 12 Pass, R. F. *et al.* A subunit cytomegalovirus vaccine based on recombinant envelope  
660 glycoprotein B and a new adjuvant. *The Journal of infectious diseases* **180**, 970-975,  
661 doi:10.1086/315022 (1999).
- 662 13 Pass, R. F. *et al.* Vaccine prevention of maternal cytomegalovirus infection. *The New*  
663 *England journal of medicine* **360**, 1191-1199, doi:10.1056/NEJMoa0804749 (2009).
- 664 14 Bernstein, D. I. *et al.* Safety and efficacy of a cytomegalovirus glycoprotein B (gB)  
665 vaccine in adolescent girls: A randomized clinical trial. *Vaccine* **34**, 313-319,  
666 doi:10.1016/j.vaccine.2015.11.056 (2016).
- 667 15 Adler, S. P. *et al.* A canarypox vector expressing cytomegalovirus (CMV) glycoprotein B  
668 primes for antibody responses to a live attenuated CMV vaccine (Towne). *The Journal of*  
669 *infectious diseases* **180**, 843-846, doi:10.1086/314951 (1999).
- 670 16 Berencsi, K. *et al.* A canarypox vector-expressing cytomegalovirus (CMV)  
671 phosphoprotein 65 induces long-lasting cytotoxic T cell responses in human CMV-  
672 seronegative subjects. *The Journal of infectious diseases* **183**, 1171-1179,  
673 doi:10.1086/319680 (2001).
- 674 17 Wussow, F. *et al.* Human cytomegalovirus vaccine based on the envelope gH/gL  
675 pentamer complex. *PLoS pathogens* **10**, e1004524, doi:10.1371/journal.ppat.1004524  
676 (2014).

- 677 18 Wloch, M. K. *et al.* Safety and immunogenicity of a bivalent cytomegalovirus DNA  
678 vaccine in healthy adult subjects. *The Journal of infectious diseases* **197**, 1634-1642,  
679 doi:10.1086/588385 (2008).
- 680 19 Jacobson, M. A. *et al.* A CMV DNA vaccine primes for memory immune responses to  
681 live-attenuated CMV (Towne strain). *Vaccine* **27**, 1540-1548,  
682 doi:10.1016/j.vaccine.2009.01.006 (2009).
- 683 20 Lilleri, D., Kabanova, A., Lanzavecchia, A. & Gerna, G. Antibodies against neutralization  
684 epitopes of human cytomegalovirus gH/gL/pUL128-130-131 complex and virus  
685 spreading may correlate with virus control in vivo. *J Clin Immunol* **32**, 1324-1331,  
686 doi:10.1007/s10875-012-9739-3 (2012).
- 687 21 Lilleri, D. *et al.* Fetal human cytomegalovirus transmission correlates with delayed  
688 maternal antibodies to gH/gL/pUL128-130-131 complex during primary infection. *PloS*  
689 *one* **8**, e59863, doi:10.1371/journal.pone.0059863 (2013).
- 690 22 Boppana, S. B. & Britt, W. J. Antiviral Antibody Responses and Intrauterine  
691 Transmission after Primary Maternal Cytomegalovirus Infection. *Journal of Infectious*  
692 *Diseases* **171**, 1115-1121, doi:10.1093/infdis/171.5.1115 (1995).
- 693 23 Revello, M. G. *et al.* A randomized trial of hyperimmune globulin to prevent congenital  
694 cytomegalovirus. *The New England journal of medicine* **370**, 1316-1326,  
695 doi:10.1056/NEJMoa1310214 (2014).
- 696 24 Bialas, K. M. *et al.* Maternal CD4 + T cells protect against severe congenital  
697 cytomegalovirus disease in a novel nonhuman primate model of placental  
698 cytomegalovirus transmission. *Proceedings of the National Academy of Sciences* **112**,  
699 13645-13650, doi:10.1073/pnas.1511526112 (2015).
- 700 25 Hansen, S. G., Strelow, L. I., Franchi, D. C., Anders, D. G. & Wong, S. W. Complete  
701 sequence and genomic analysis of rhesus cytomegalovirus. *Journal of virology* **77**,  
702 6620-6636 (2003).



- 703 26 Yue, Y. & Barry, P. A. Rhesus cytomegalovirus a nonhuman primate model for the study  
704 of human cytomegalovirus. *Adv Virus Res* **72**, 207-226, doi:10.1016/S0065-  
705 3527(08)00405-3 (2008).
- 706 27 Kaur, A. *et al.* Cytotoxic T-lymphocyte responses to cytomegalovirus in normal and  
707 simian immunodeficiency virus-infected rhesus macaques. *Journal of virology* **70**, 7725-  
708 7733 (1996).
- 709 28 Oxford, K. L. *et al.* Open reading frames carried on UL/b' are implicated in shedding and  
710 horizontal transmission of rhesus cytomegalovirus in rhesus monkeys. *Journal of*  
711 *virology* **85**, 5105-5114, doi:10.1128/JVI.02631-10 (2011).
- 712 29 Revello, M. G., Sarasini, A., Zavattoni, M., Baldanti, F. & Gerna, G. Improved prenatal  
713 diagnosis of congenital human cytomegalovirus infection by a modified nested  
714 polymerase chain reaction. *J Med Virol* **56**, 99-103 (1998).
- 715 30 Heinze, G., Gnant, M. & Schemper, M. Exact log-rank tests for unequal follow-up.  
716 *Biometrics* **59**, 1151-1157 (2003).
- 717 31 Smith, C. L. *et al.* Identification of a human neonatal immune-metabolic network  
718 associated with bacterial infection. *Nature communications* **5**, 4649,  
719 doi:10.1038/ncomms5649 (2014).
- 720 32 Fowler, K. B., Stagno, S. & Pass, R. F. Maternal immunity and prevention of congenital  
721 cytomegalovirus infection. *Jama* **289**, 1008-1011 (2003).
- 722 33 Bratcher, D. F. *et al.* Effect of passive antibody on congenital cytomegalovirus infection  
723 in guinea pigs. *The Journal of infectious diseases* **172**, 944-950 (1995).
- 724 34 Bourne, N., Schleiss, M. R., Bravo, F. J. & Bernstein, D. I. Preconception immunization  
725 with a cytomegalovirus (CMV) glycoprotein vaccine improves pregnancy outcome in a  
726 guinea pig model of congenital CMV infection. *The Journal of infectious diseases* **183**,  
727 59-64, doi:10.1086/317654 (2001).

- 728 35 Chatterjee, A., Harrison, C. J., Britt, W. J. & Bewtra, C. Modification of maternal and  
729 congenital cytomegalovirus infection by anti-glycoprotein b antibody transfer in guinea  
730 pigs. *The Journal of infectious diseases* **183**, 1547-1553, doi:10.1086/320714 (2001).
- 731 36 Auerbach, M. R. *et al.* A neutralizing anti-gH/gL monoclonal antibody is protective in the  
732 guinea pig model of congenital CMV infection. *PLoS pathogens* **10**, e1004060,  
733 doi:10.1371/journal.ppat.1004060 (2014).
- 734 37 Nigro, G., Adler, S. P., La Torre, R., Best, A. M. & Congenital Cytomegalovirus  
735 Collaborating, G. Passive immunization during pregnancy for congenital cytomegalovirus  
736 infection. *The New England journal of medicine* **353**, 1350-1362,  
737 doi:10.1056/NEJMoa043337 (2005).
- 738 38 Visentin, S. *et al.* Early primary cytomegalovirus infection in pregnancy: maternal  
739 hyperimmunoglobulin therapy improves outcomes among infants at 1 year of age. *Clin*  
740 *Infect Dis* **55**, 497-503, doi:10.1093/cid/cis423 (2012).
- 741 39 Nigro, G. *et al.* Immunoglobulin therapy of fetal cytomegalovirus infection occurring in  
742 the first half of pregnancy--a case-control study of the outcome in children. *The Journal*  
743 *of infectious diseases* **205**, 215-227, doi:10.1093/infdis/jir718 (2012).
- 744 40 Cekinovic, D. *et al.* Passive immunization reduces murine cytomegalovirus-induced  
745 brain pathology in newborn mice. *Journal of virology* **82**, 12172-12180,  
746 doi:10.1128/JVI.01214-08 (2008).
- 747 41 Planitzer, C. B., Saemann, M. D., Gajek, H., Farcet, M. R. & Kreil, T. R. Cytomegalovirus  
748 neutralization by hyperimmune and standard intravenous immunoglobulin preparations.  
749 *Transplantation* **92**, 267-270, doi:10.1097/TP.0b013e318224115e (2011).
- 750 42 Fouts, A. E., Chan, P., Stephan, J. P., Vandlen, R. & Feierbach, B. Antibodies against  
751 the gH/gL/UL128/UL130/UL131 complex comprise the majority of the anti-  
752 cytomegalovirus (anti-CMV) neutralizing antibody response in CMV hyperimmune  
753 globulin. *Journal of virology* **86**, 7444-7447, doi:10.1128/JVI.00467-12 (2012).

- 754 43 Loughney, J. W. *et al.* Soluble Human Cytomegalovirus gH/gL/pUL128-131 Pentameric  
755 Complex, but Not gH/gL, Inhibits Viral Entry to Epithelial Cells and Presents Dominant  
756 Native Neutralizing Epitopes. *J Biol Chem* **290**, 15985-15995,  
757 doi:10.1074/jbc.M115.652230 (2015).
- 758 44 Coleman, S., Choi, K. Y., Root, M. & McGregor, A. A Homolog Pentameric Complex  
759 Dictates Viral Epithelial Tropism, Pathogenicity and Congenital Infection Rate in Guinea  
760 Pig Cytomegalovirus. *PLoS pathogens* **12**, e1005755, doi:10.1371/journal.ppat.1005755  
761 (2016).
- 762 45 Wang, D. *et al.* Quantitative analysis of neutralizing antibody response to human  
763 cytomegalovirus in natural infection. *Vaccine* **29**, 9075-9080,  
764 doi:10.1016/j.vaccine.2011.09.056 (2011).
- 765 46 Revello, M. G. *et al.* Human cytomegalovirus in blood of immunocompetent persons  
766 during primary infection: prognostic implications for pregnancy. *The Journal of infectious*  
767 *diseases* **177**, 1170-1175 (1998).
- 768 47 Koga, K. & Mor, G. Toll-like receptors at the maternal-fetal interface in normal pregnancy  
769 and pregnancy disorders. *American journal of reproductive immunology : AJRI : official*  
770 *journal of the American Society for the Immunology of Reproduction and the*  
771 *International Coordination Committee for Immunology of Reproduction* **63**, 587-600,  
772 doi:10.1111/j.1600-0897.2010.00848.x (2010).
- 773 48 Racicot, K., Kwon, J. Y., Aldo, P., Silasi, M. & Mor, G. Understanding the complexity of  
774 the immune system during pregnancy. *American journal of reproductive immunology :*  
775 *AJRI : official journal of the American Society for the Immunology of Reproduction and*  
776 *the International Coordination Committee for Immunology of Reproduction* **72**, 107-116,  
777 doi:10.1111/aji.12289 (2014).
- 778 49 Male, V. *et al.* The effect of pregnancy on the uterine NK cell KIR repertoire. *Eur J*  
779 *Immunol* **41**, 3017-3027, doi:10.1002/eji.201141445 (2011).

- 780 50 Min-Oo, G. & Lanier, L. L. Cytomegalovirus generates long-lived antigen-specific NK  
781 cells with diminished bystander activation to heterologous infection. *The Journal of*  
782 *experimental medicine* **211**, 2669-2680, doi:10.1084/jem.20141172 (2014).
- 783 51 Kuijpers, T. W. *et al.* Human NK cells can control CMV infection in the absence of T  
784 cells. *Blood* **112**, 914-915, doi:10.1182/blood-2008-05-157354 (2008).
- 785 52 Adler, S. P. & Nigro, G. Findings and conclusions from CMV hyperimmune globulin  
786 treatment trials. *Journal of clinical virology : the official publication of the Pan American*  
787 *Society for Clinical Virology* **46 Suppl 4**, S54-57, doi:10.1016/j.jcv.2009.08.017 (2009).
- 788 53 Cheeran, M. C., Lokensgard, J. R. & Schleiss, M. R. Neuropathogenesis of congenital  
789 cytomegalovirus infection: disease mechanisms and prospects for intervention. *Clin*  
790 *Microbiol Rev* **22**, 99-126, Table of Contents, doi:10.1128/CMR.00023-08 (2009).
- 791 54 Maidji, E. *et al.* Antibody treatment promotes compensation for human cytomegalovirus-  
792 induced pathogenesis and a hypoxia-like condition in placentas with congenital infection.  
793 *Am J Pathol* **177**, 1298-1310, doi:10.2353/ajpath.2010.091210 (2010).
- 794 55 Council, N. R. *Guide for the Care and Use of Laboratory Animals*. 8th Edition edn,  
795 (National Academies Press, 2011).
- 796 56 Kaur, A. *et al.* Decreased frequency of cytomegalovirus (CMV)-specific CD4+ T  
797 lymphocytes in simian immunodeficiency virus-infected rhesus macaques: inverse  
798 relationship with CMV viremia. *Journal of virology* **76**, 3646-3658 (2002).
- 799 57 Zhang, J., Kobert, K., Flouri, T. & Stamatakis, A. PEAR: a fast and accurate Illumina  
800 Paired-End reAd mergeR. *Bioinformatics* **30**, 614-620, doi:10.1093/bioinformatics/btt593  
801 (2014).
- 802 58 Nelson, C. W. & Hughes, A. L. Within-host nucleotide diversity of virus populations:  
803 insights from next-generation sequencing. *Infect Genet Evol* **30**, 1-7,  
804 doi:10.1016/j.meegid.2014.11.026 (2015).

- 805 59 Gautier, L., Cope, L., Bolstad, B. M. & Irizarry, R. A. affy--analysis of Affymetrix  
806 GeneChip data at the probe level. *Bioinformatics* **20**, 307-315,  
807 doi:10.1093/bioinformatics/btg405 (2004).
- 808 60 Gentleman, R. C. *et al.* Bioconductor: open software development for computational  
809 biology and bioinformatics. *Genome Biol* **5**, R80, doi:10.1186/gb-2004-5-10-r80 (2004).
- 810 61 Ritchie, M. E. *et al.* limma powers differential expression analyses for RNA-sequencing  
811 and microarray studies. *Nucleic Acids Res* **43**, e47, doi:10.1093/nar/gkv007 (2015).
- 812 62 Mootha, V. K. *et al.* PGC-1alpha-responsive genes involved in oxidative phosphorylation  
813 are coordinately downregulated in human diabetes. *Nat Genet* **34**, 267-273,  
814 doi:10.1038/ng1180 (2003).
- 815 63 Xia, J., Gill, E. E. & Hancock, R. E. NetworkAnalyst for statistical, visual and network-  
816 based meta-analysis of gene expression data. *Nat Protoc* **10**, 823-844,  
817 doi:10.1038/nprot.2015.052 (2015).
- 818 64 Breuer, K. *et al.* InnateDB: systems biology of innate immunity and beyond--recent  
819 updates and continuing curation. *Nucleic Acids Res* **41**, D1228-1233,  
820 doi:10.1093/nar/gks1147 (2013).
- 821 65 Kanehisa, M. & Goto, S. KEGG: kyoto encyclopedia of genes and genomes. *Nucleic*  
822 *Acids Res* **28**, 27-30 (2000).
- 823 66 Benjamini, Y. & Hochberg, Y. Controlling the False Discovery Rate - a Practical and  
824 Powerful Approach to Multiple Testing. *J Roy Stat Soc B Met* **57**, 289-300 (1995).
- 825

826 **Figures:**

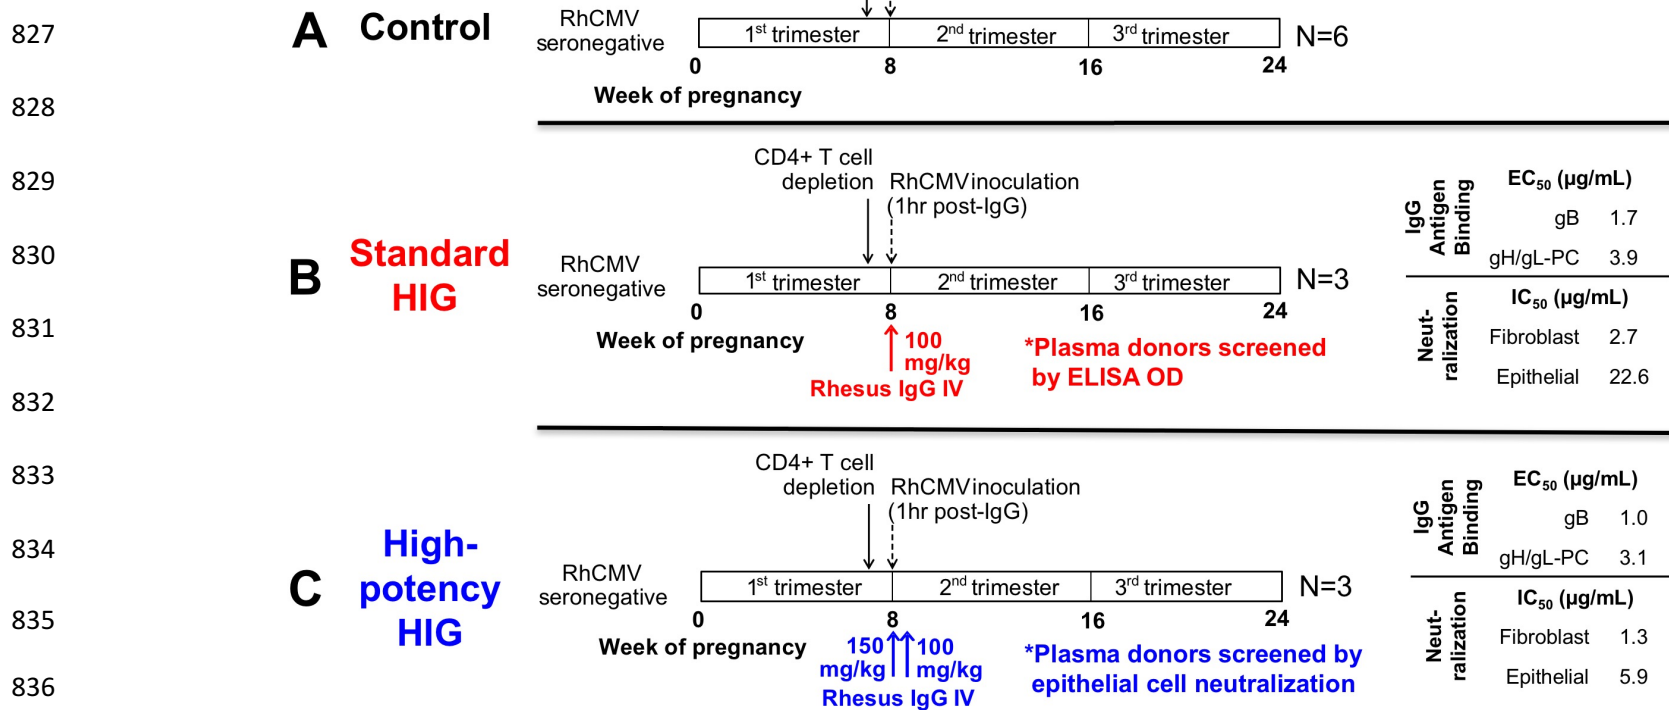

837 **Fig. 1. HIG preinfusion/RhCMV placental transmission study experimental design.** (A) 6 RhCMV-seronegative rhesus monkey  
 838 dams were CD4+ T cell depleted at week 7 of gestation then inoculated one week later with a swarm of RhCMV stocks (180.92,  
 839 UCD52, UCD59). (B) 3 seronegative, CD4+ T cell-depleted dams received a single dose (100mg/kg) of a standard HIG preparation  
 840 1hr prior to RhCMV infection. (C) 3 seronegative, CD4+ T cell-depleted dams received a dose-optimized HIG regimen (150mg/kg  
 841 prior to RhCMV infection +100mg/kg 3 days following infection) of a high neutralizing potency HIG preparation isolated from  
 842 seropositive donors screened by epithelial cell neutralization. Quantified IgG glycoprotein complex-specific binding titers as well as  
 843 fibroblast (180.92 virus) and epithelial (UCD52 virus) neutralization activity was assessed for each HIG preparation (B,C).

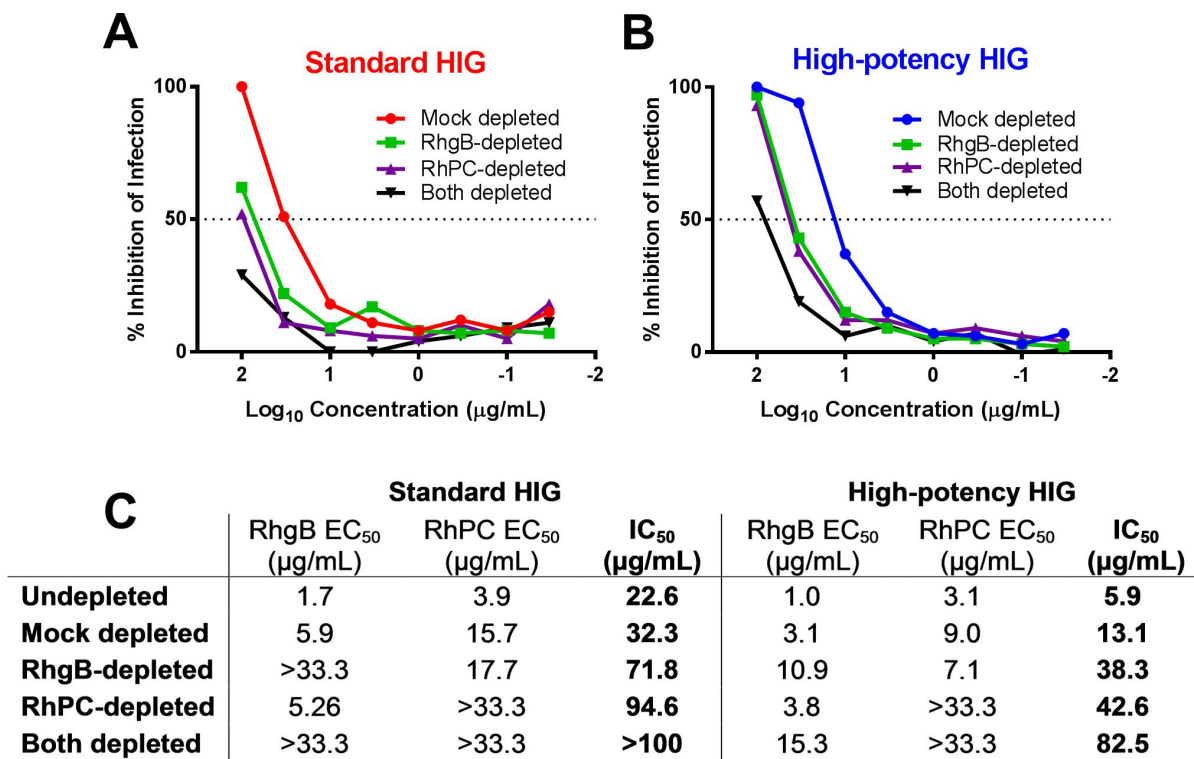

844

845 **Fig. 2. Both RhCMV gB and PC-specific antibodies contribute to neutralization activity of**  
 846 **purified HIG preparations.** Neutralization curves for standard HIG (A) and high-potency HIG  
 847 (B) compare the relative neutralization potency of mock-depleted, RhgB-depleted, RhPC-  
 848 depleted, and both RhgB/RhPC-depleted antibody preparations. (C) IC<sub>50</sub> values for depleted  
 849 antibodies measured in epithelial cells with UCD52 virus (starting concentration 100 $\mu\text{g/mL}$ ).  
 850 ELISA EC<sub>50</sub> values (measured here in  $\mu\text{g/mL}$  RhCMV HIG equivalent) confirm specific depletion  
 851 of antibodies for a given antigen (starting concentration 33.3 $\mu\text{g/mL}$ ).

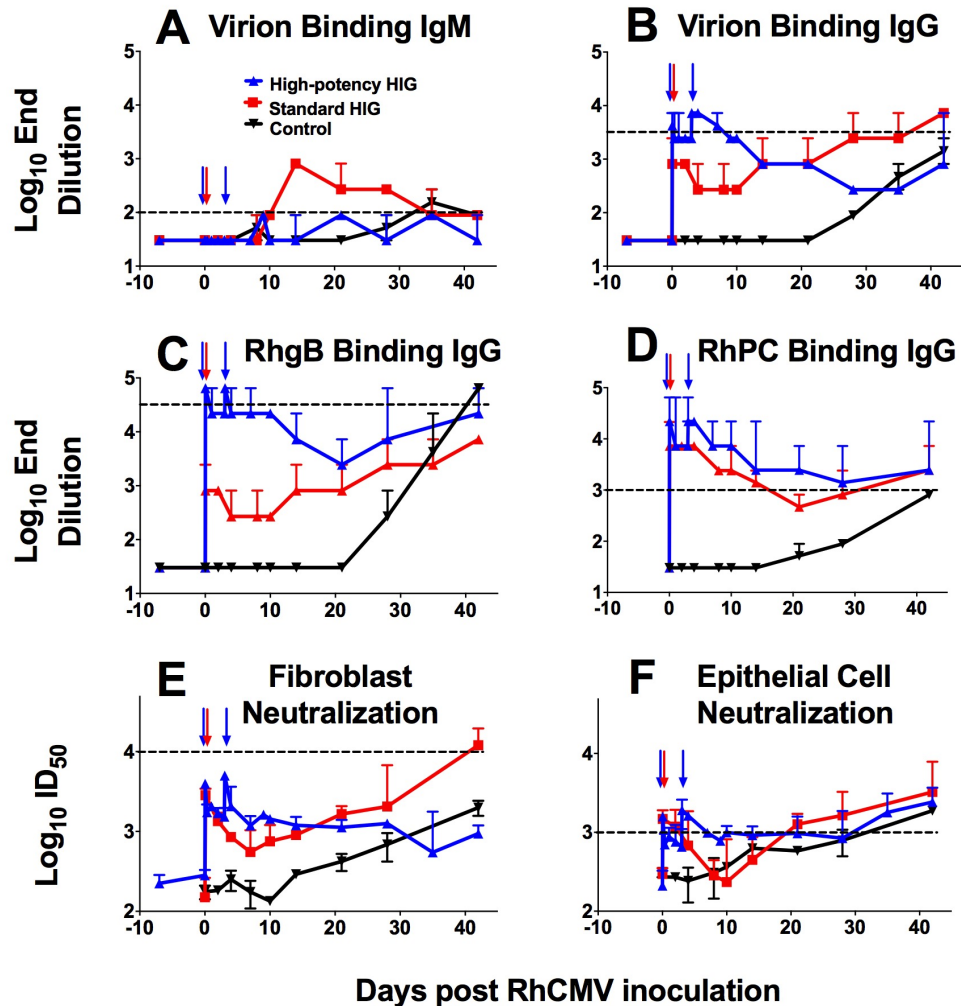

852

853 **Fig. 3. Plasma RhCMV IgM/IgG binding and neutralization following HIG infusion.** Median  
854 whole UCD52 RhCMV virion IgM (A) and IgG (B) binding titers are shown for 2 control animals  
855 in black (excluding 4 historical controls because of sample limitation), the 3 animals infused with  
856 a single dose of standard HIG in red, and the 3 animals administered a dose-optimized regimen  
857 of high-potency HIG in blue. RhCMV glycoprotein B (RhgB) (C) and RhCMV pentameric  
858 complex (RhPC) (D) binding-IgG titers demonstrate higher glycoprotein binding in the high-  
859 potency HIG-infused group. Furthermore, median neutralization titers ( $ID_{50}$ ) were measured on  
860 fibroblast (180.92 virus) (D) and epithelial cells (UCD52 virus) (E). The time points of HIG  
861 infusion are denoted by colored arrows. Error bars represent the range of results between dams  
862 within the same treatment group. Horizontal dotted lines indicate average antibody binding and  
863 neutralization titers for chronically RhCMV-infected rhesus monkeys.



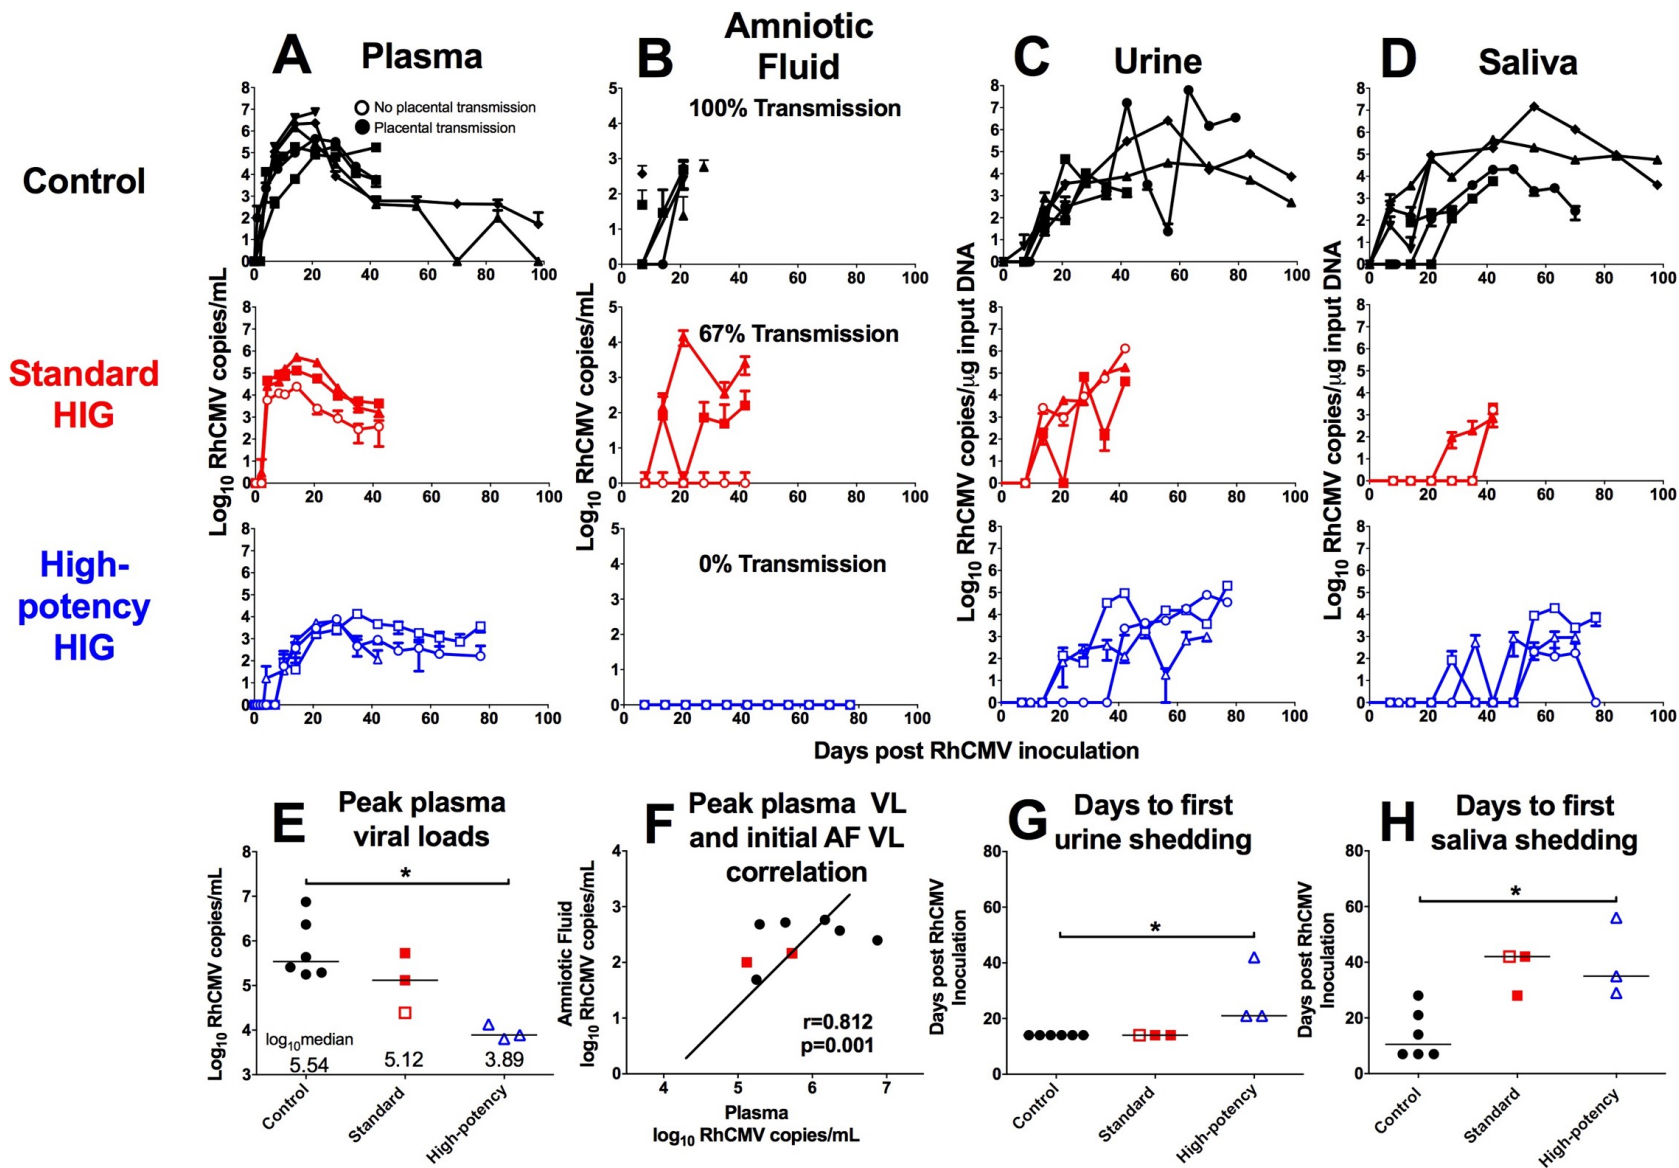

864 Fig. 4. Infusion with high-potency HIG prior to RhCMV infection reduces plasma viral load, prevents placental virus

865 transmission, and delays viral shedding. Legend next page.

866 **Fig. 4. Infusion with high-potency HIG prior to RhCMV infection reduces plasma viral**  
867 **load, prevents placental virus transmission, and delays viral shedding.** RhCMV copy  
868 number determined by qPCR is shown for control animals (n=6; black), the standard HIG group  
869 (n=3; red), and the high-potency HIG group (n=3; blue) in plasma (**A**), amniotic fluid (**B**), urine  
870 (**C**), and saliva (**D**). Data shown as the mean value of 6 or more individual replicates, with error  
871 bars indicating SD. Filled symbols represent animals with placental transmission, and non-filled  
872 symbols represent those without transmission. (**E**) Compared to the control group, median peak  
873 plasma viral load (VL) is reduced by nearly 2 logs in high-potency HIG group (p=0.047,  
874 corrected Wilcoxon exact test). (**F**) There is a correlation between peak maternal plasma VL and  
875 initial amniotic fluid VL (r=0.812, p=0.002, nonparametric Spearman correlation). Additionally in  
876 comparison to the control group, the average number of days to first urine shedding (**G**) and first  
877 saliva shedding (**H**) is increased in the high-potency HIG group (both p=0.047, corrected  
878 Wilcoxon exact test). Horizontal bars indicate median values. \*p<0.05, corrected Wilcoxon exact  
879 test.

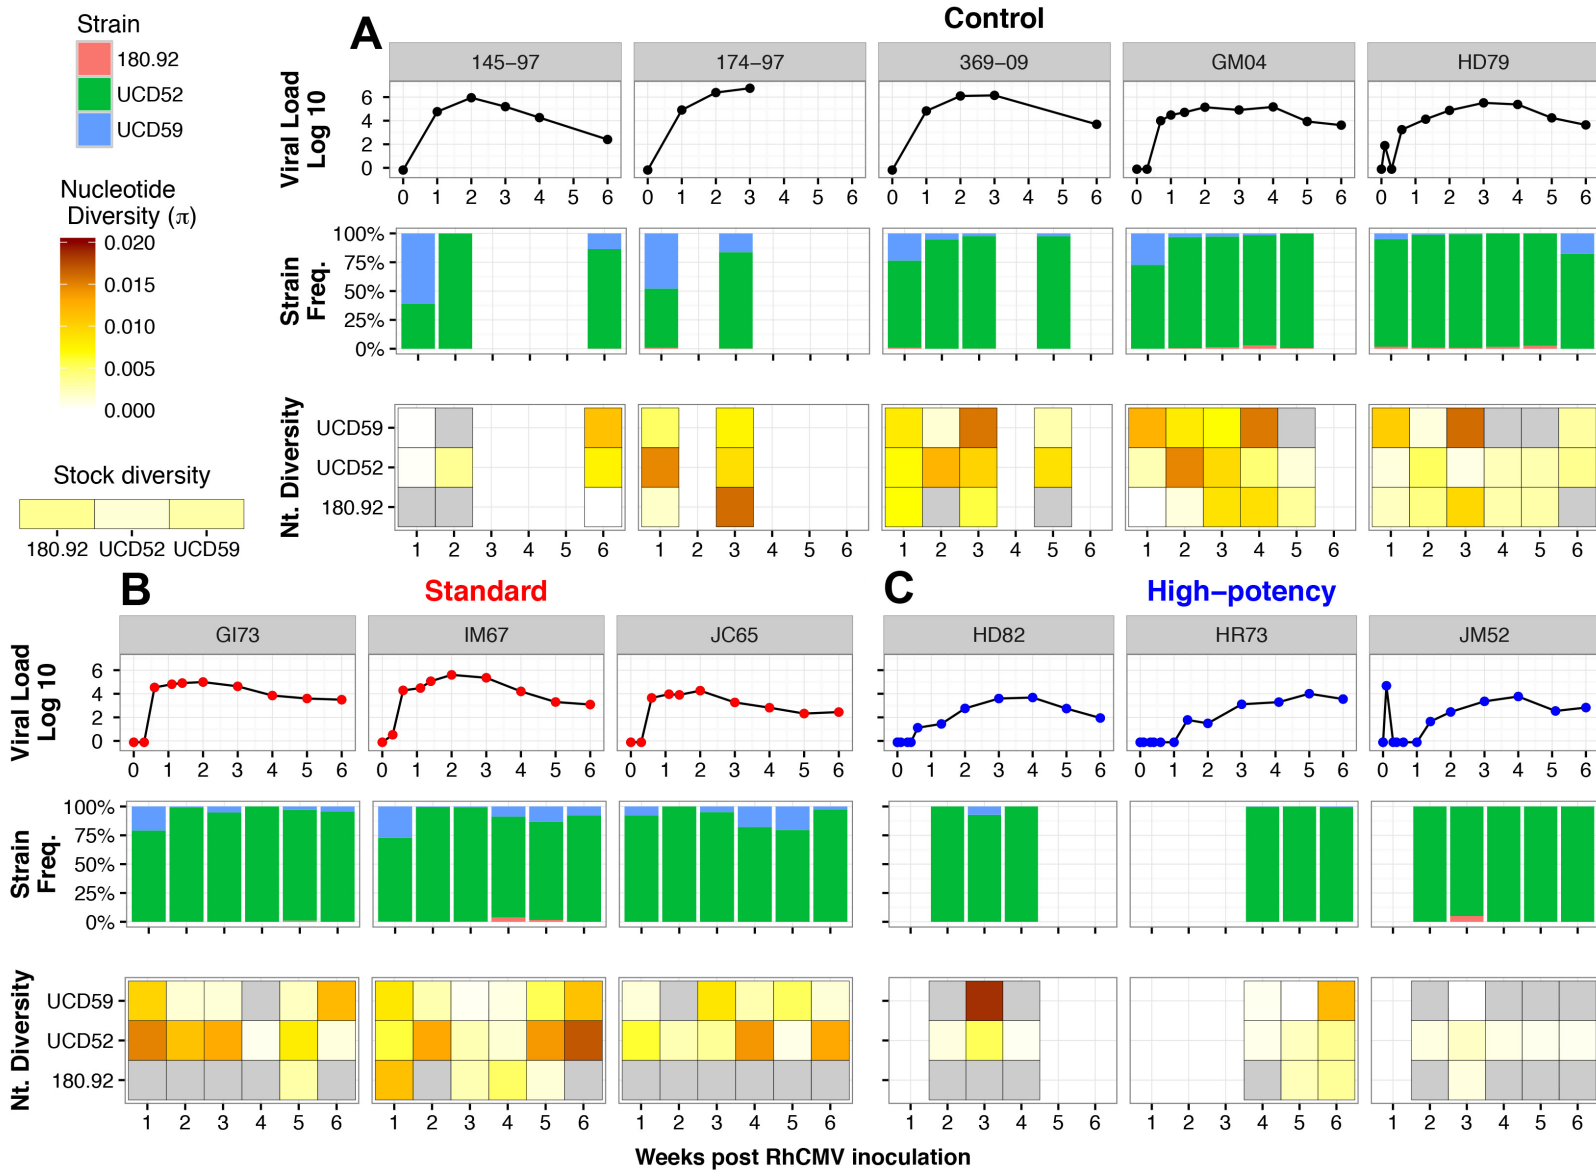

880

881 **Fig. 5. Plasma RhCMV gB sequence diversity is decreased following high-potency HIG infusion. Legend next page.**

882 **Fig. 5. Plasma RhCMV gB sequence diversity is decreased following high-potency HIG**  
883 **infusion.** SNAPP deep sequencing analysis at the glycoprotein B locus for maternal plasma  
884 virus population is shown for **(A)** 5 control dams (145-97, 174,97, 369-09, GM04, and HD79),  
885 **(B)** 3 standard HIG infused dams (GI73, IM67, and JC65), and **(C)** 3 high-potency HIG infused  
886 dams (HD82, HR73, and JM52). The **top panel** for each animal indicates the plasma viral load.  
887 The **middle panel** indicates the percentage of sequence reads corresponding to each of the  
888 three inoculated RhCMV strains in plasma at weeks 1-6 post infection (180.92 in pink, UCD52 in  
889 green, and UCD59 in blue), which was similar between the treatment groups. The **bottom**  
890 **panel** for each animal is a heat map depiction of viral nucleotide diversity ( $\pi$ ). Scale ranges  
891 from white ( $\pi=0$ ) to dark red ( $\pi=0.02$ ), with the diversity of each viral stock displayed for  
892 reference. Gray coloring indicates that no sequence reads were detected at that time point for a  
893 given viral variant. Blank areas represent sample non-availability (control group) or limited  
894 plasma viral load (<100 copies/mL). There is a significant reduction in diversity at the gB locus  
895 for the dominant strain in plasma (UCD52) following high-potency HIG infusion (\* $p=0.036$ ,  
896 Mann-Whitney U test).

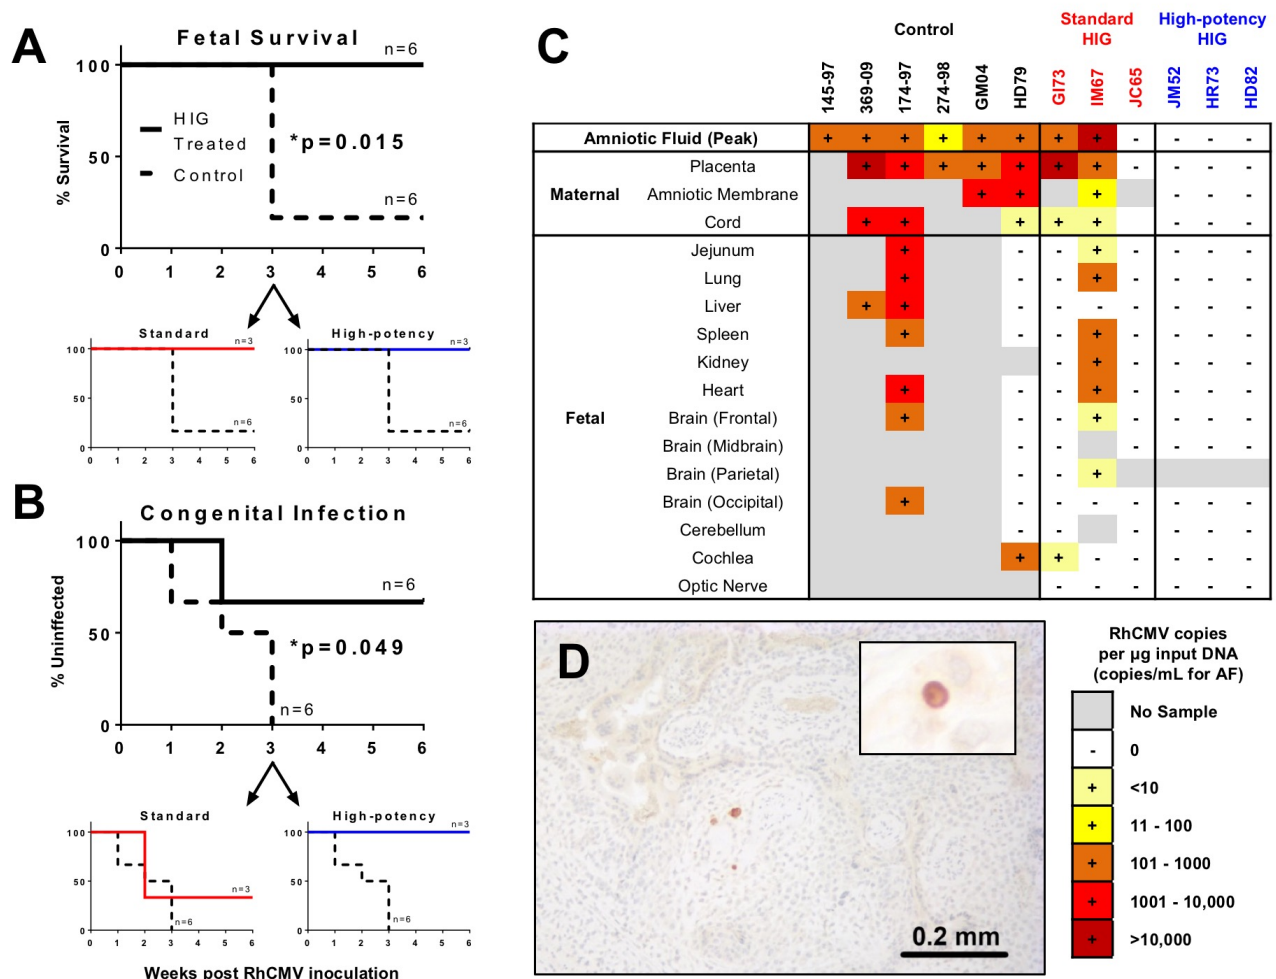

897

898 **Fig. 6. Maternal HIG pre-infusion significantly reduces incidence and severity of RhCMV**

899 **congenital infection.** (A) Fetal survival was significantly increased following HIG infusion

900 ( $p=0.015$ , Exact log-rank test based on Heinze Macro), and both standard HIG and high-

901 potency HIG infusion were sufficient to prevent fetal loss. (B) Rate of congenital infection was

902 significantly reduced following HIG pre-infusion ( $p=0.049$ , Exact log-rank test based on Heinze

903 Macro), though 2/3 animals in the standard HIG group had congenitally-infected infants

904 compared with 0/3 in the high-potency HIG group. (C) Heat map separated by treatment group

905 demonstrates heterogeneity in the viral burden of amniotic fluid, placenta, amniotic membrane,

906 cord, and fetal tissues. (D) Placental infection was detected by immunohistochemistry for

907 RhCMV IE-1 protein, with rare cells in the trophoblastic shell of IM67 (Standard HIG) exhibiting

908 intranuclear staining. Inset: higher magnification of cell exhibiting intranuclear staining.

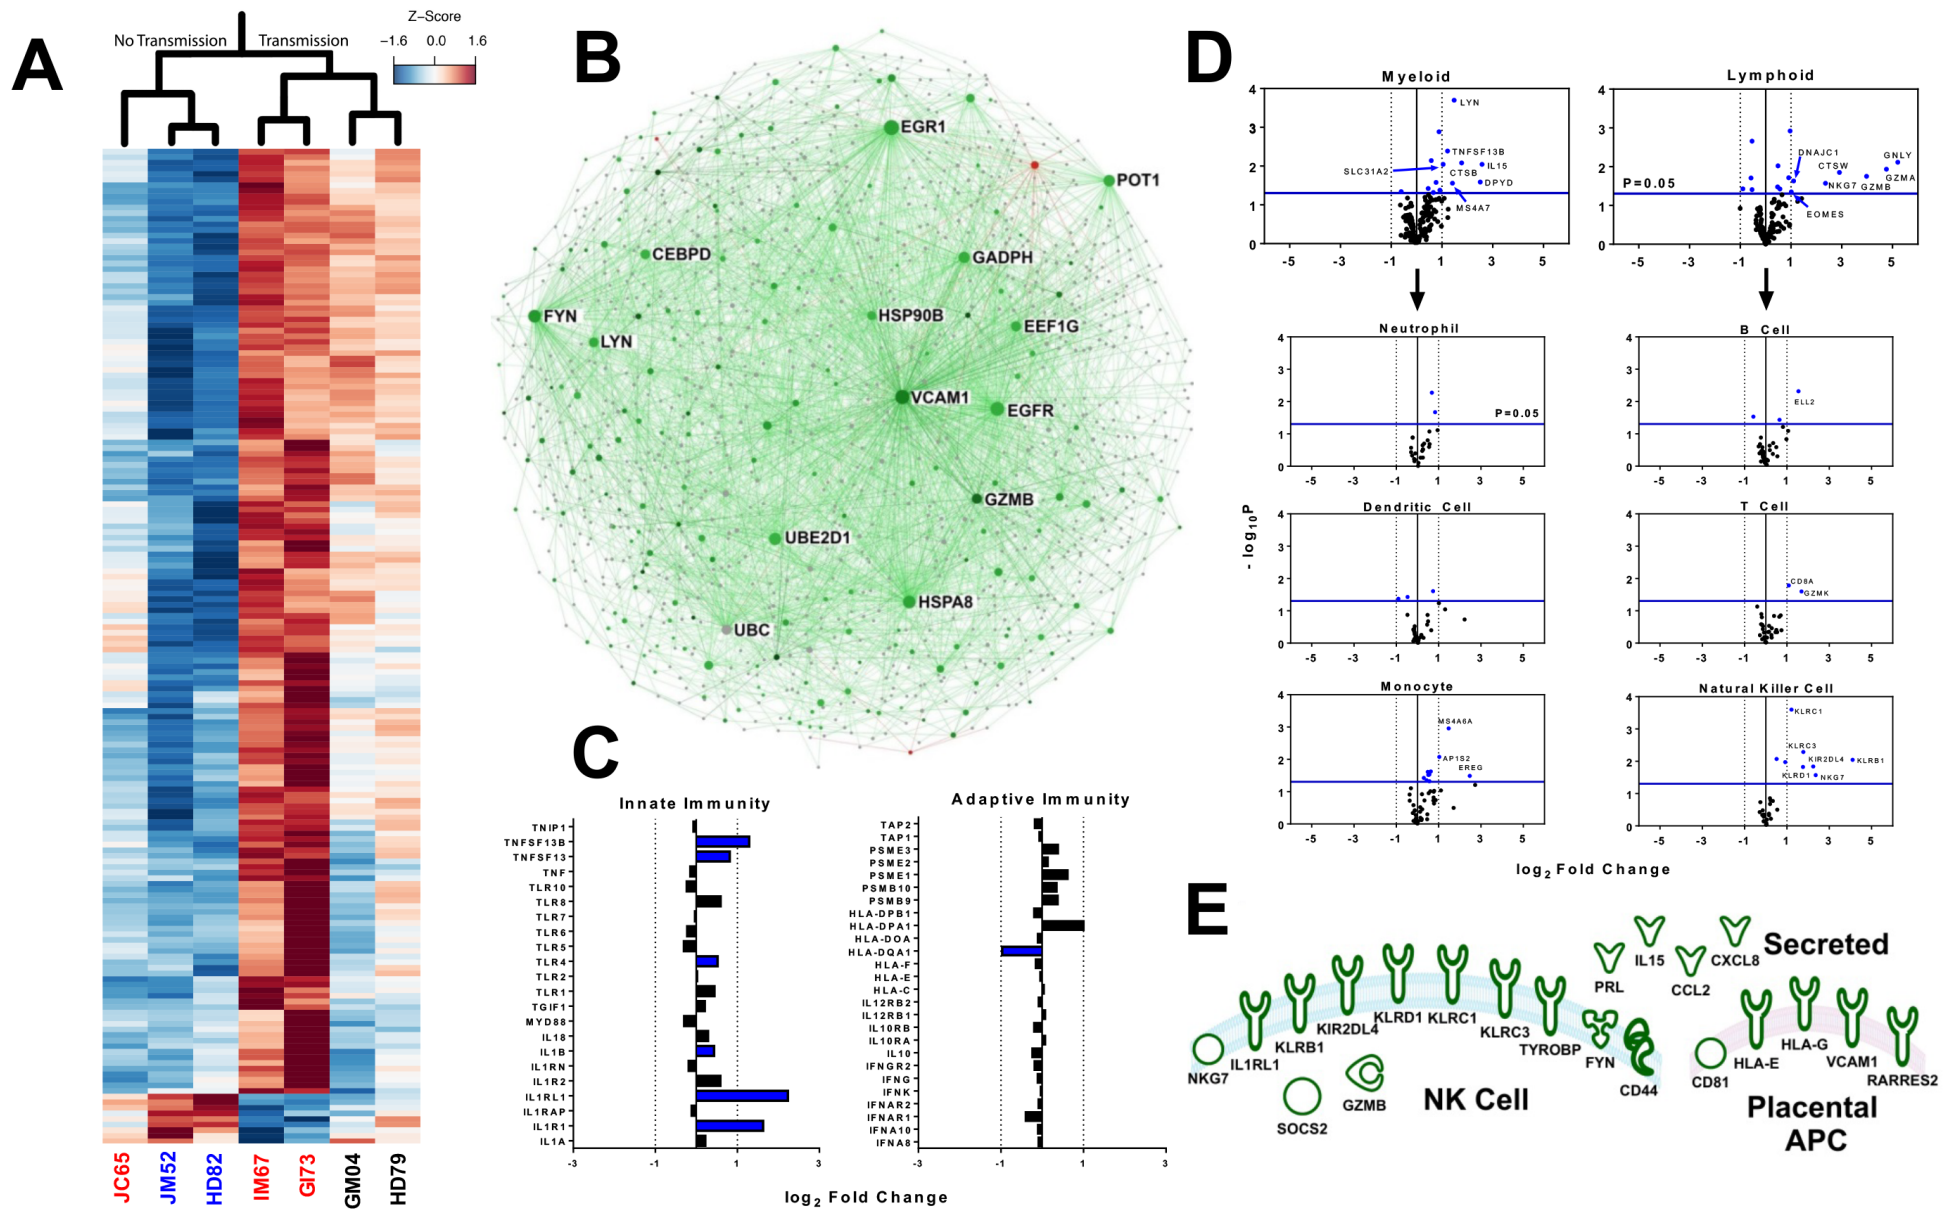

909 Fig. 7. Placental transcriptome shifts following RhCMV congenital infection. Legend next page

910 **Fig. 7. Placental transcriptome shifts following RhCMV congenital infection. (A)** Heat map  
911 depicting normalized fold change of top differentially expressed genes ( $p < 0.01$ ,  $fc > 2.0$ ) in  
912 monkey dam placenta with and without RhCMV congenital infection (red=relative up-regulation  
913 in RhCMV infection, blue=relative down-regulation) **(B)** Interaction network for all differentially  
914 regulated genes ( $p < 0.05$ ,  $fc > 2.0$ ) suggests that genes up-regulated in congenital infection  
915 (green) greatly outnumber those up-regulated in no infection (red). Node size reflects the  
916 number of gene interactions (InnateDB database), while color intensity indicates degree of fold  
917 change. **(C)** Analysis of innate vs. adaptive immune genes suggests some preference for up-  
918 regulation of innate immunity following infection, with blue denoting a statistically significant  
919 change ( $p < 0.05$ ) **(D)** Cell type enrichment analysis suggests no preference for myeloid vs.  
920 lymphoid lineages, but that genes specific for monocytes and NK cells are up-regulated  
921 following congenital infection. Statistically significant genes ( $p < 0.05$ ) shown in blue, and  
922 significant genes with a  $fc > 2.0$  are labeled. **(E)** Diagram depicting placental genes related to NK  
923 cell movement and/or function (defined by IPA and KEGG databases) that are differentially up-  
924 regulated ( $p < 0.05$ ,  $fc > 2$ ) in placental RhCMV infection.
